# Supplementary material for: Synthesis of novel functional polycyclic chromones through Michael addition and double cyclizations
Source: Royal Society of Chemistry journal article supplement (doi:10.1039/c0ob01000f), 2011-01-01
Supplement: c0ob01000f.pdf [file c0ob01000f.pdf]

# Synthesis of Novel Functional Polycyclic Chromones through Michael Addition and Double Cyclizations

*Yang Liu, Liping Huang, Fuchun Xie, Xuxing Chen and Youhong Hu\**

State Key Laboratory of Drug Research, Shanghai Institute of Materia Medica, Chinese Academy of Sciences, 555 Zu Chong Zhi Road, Shanghai, 201203, China

[yhhu@mail.shcnc.ac.cn](mailto:yhhu@mail.shcnc.ac.cn)

## Supporting Information

### List of contents

|                                                       |         |
|-------------------------------------------------------|---------|
| Experiment procedures                                 | S2-S3   |
| Characterization data:                                |         |
| <b>3aa-3ma</b>                                        | S3-S7   |
| <b>3ab-3af</b>                                        | S7-S9   |
| <b>4b</b>                                             | S9      |
| <sup>1</sup> H NMR and <sup>13</sup> C NMR spectra    | S10-S29 |
| X-ray crystal structures of <b>3aa</b> and <b>3ka</b> | S30     |

## 1. Experiment procedures

All reactions were performed under nitrogen atmosphere. Dry solvents were distilled prior to use: DMF was dried over microwave-dried molecular sieve; Petroleum ether refers to the fraction with boiling point in the range 60-90 °C. All  $^1\text{H}$  NMR and  $^{13}\text{C}$  NMR spectra were measured in  $\text{CDCl}_3$  or  $d_6$ -DMSO with TMS as the internal standard. Chemical shifts are expressed in ppm and  $J$  values are given in Hz. High resolution mass spectra were recorded on a Finnigan MAT 95 mass spectrometer (EI). Column chromatography was performed with 200-300 mesh silica gel using flash column techniques. Melting points was uncorrected.

### General Procedure:

#### 1.1 Tandem reaction of 3-(1-Alkynyl)chromones and 2-(2-bromophenyl)acetonitrile compounds to novel functional polycyclic chromenones 3

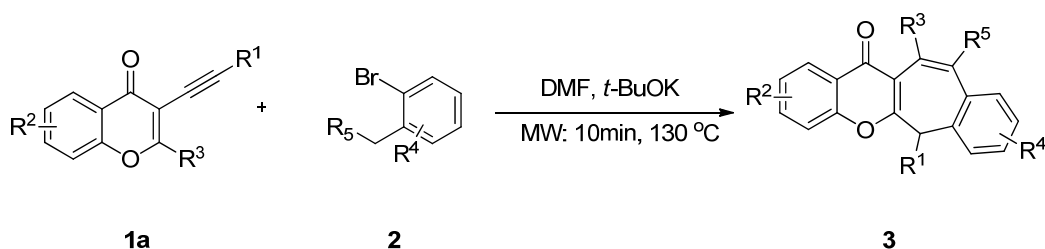

A typical procedure for the preparation of 3aa: To a solution of 2-(2-bromophenyl)acetonitrile **2aa** (40 mg, 0.2 mmol) in dry DMF (1 mL) was added *t*-BuOK (24 mg, 0.2 mmol) at room temperature under nitrogen atmosphere. After stirring for 5 min, compound **1a** (50 mg, 0.2 mmol) was added and the resulting dark red solution was irradiated for 10 min at 130 °C (monitored by TLC). The mixture was extracted with ethyl acetate (10 mL×3). The combined organic layers were washed with brine (10 mL), dried over anhydrous  $\text{Na}_2\text{SO}_4$ , filtered and concentrated to give the crude product, which was further purified by column chromatography (petroleum ether/ethyl acetate 6:1) to afford compound **3aa** as a white solid.

#### 1.2 Tandem reaction of 1a with 2g to Xanthone 4b

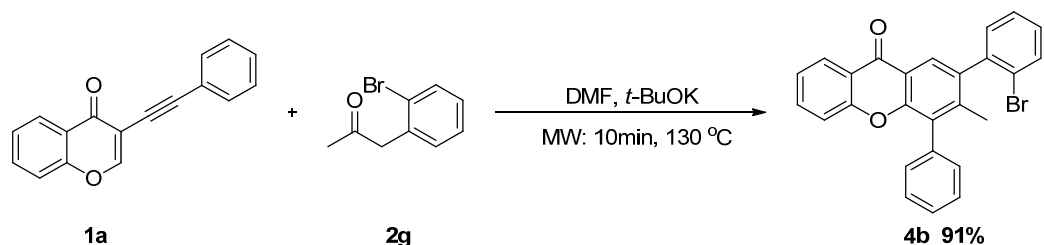

To a solution of 1-(2-bromophenyl)propan-2-one **2g** (44 mg, 0.2 mmol) in dry DMF (1 mL) was added *t*-BuOK (24 mg, 0.2 mmol) at room temperature under nitrogen atmosphere. After stirring for 5 min, compound **1a** (50 mg, 0.2 mmol) was added and the resulting dark red solution was irradiated for 10 min at 130 °C (monitored by TLC). The mixture was extracted with ethyl acetate (10 mL×3). The combined

organic layers were washed with brine (10 mL), dried over anhydrous Na<sub>2</sub>SO<sub>4</sub>, filtered and concentrated to give the crude product, which was further purified by column chromatography (petroleum ether/ethyl acetate 10:1) to afford compound **4b** as a white solid.

## 2. Characterization Data:

### 2.1 3aa-3ma

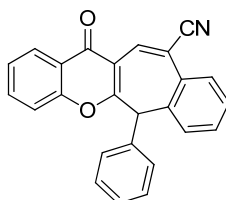

#### 13-oxo-6-phenyl-6,13-dihydrobenzo[5,6]cyclohepta[1,2-*b*]chromene-11-carbonitrile (**3aa**)

As a white solid: m.p. 235-236 °C; IR (KBr)  $\nu_{\max}$  3429, 3053, 2212, 1651, 1620, 1570, 1464, 1400, 1365, 1217, 1167, 764, 710 cm<sup>-1</sup>; <sup>1</sup>H NMR (300 MHz, CDCl<sub>3</sub>)  $\delta$ : 8.27 (dd, *J* = 1.8, 7.9 Hz, 1H), 7.91 (dd, *J* = 1.4, 7.4 Hz, 1H), 7.70-7.79 (m, 2H), 7.44-7.67 (m, 5H), 7.12-7.21 (m, 3H), 6.70-6.77 (m, 2H), 5.51 (s, 1H). <sup>13</sup>C NMR (100 MHz, CDCl<sub>3</sub>)  $\delta$ : 175.8, 166.0, 155.9, 136.2, 135.8, 134.3, 133.9, 131.2, 131.1, 128.9, 128.6, 128.3, 127.6, 126.4, 126.3, 126.1, 122.6, 118.8, 118.1, 116.1, 114.9, 55.0. HRMS [M]<sup>+</sup> Calculated for C<sub>25</sub>H<sub>15</sub>NO<sub>2</sub> 361.1103, found 361.1106.

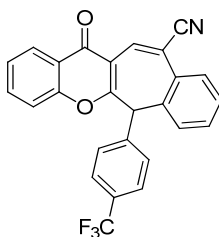

#### 13-oxo-6-(4-(trifluoromethyl)phenyl)-6,13-dihydrobenzo[5,6]cyclohepta[1,2-*b*]chromene-11-carbonitrile (**3ba**)

As a white solid: m.p. 225-226 °C; IR (KBr)  $\nu_{\max}$  3425, 3041, 2216, 1657, 1620, 1570, 1466, 1400, 1327, 1217, 1180, 1130, 1016, 941, 845, 766, 492 cm<sup>-1</sup>; <sup>1</sup>H NMR (300 MHz, CDCl<sub>3</sub>)  $\delta$ : 8.27 (dd, *J* = 1.8, 7.8 Hz, 1H), 7.94 (dd, *J* = 1.5, 7.7 Hz, 1H), 7.74-7.80 (m, 2H), 7.67 (td, *J* = 1.5, 7.4 Hz, 1H), 7.53-7.62 (m, 3H), 7.51 (t, *J* = 7.4 Hz, 1H), 7.44 (d, *J* = 8.3 Hz, 2H), 6.88 (d, *J* = 8.3 Hz, 2H), 5.52 (s, 1H). <sup>13</sup>C NMR (100 MHz, CDCl<sub>3</sub>)  $\delta$ : 175.6, 164.8, 155.8, 140.0, 135.4, 134.5, 133.9, 131.5, 131.1, 131.0, 130.1, 129.8, 129.1, 129.0, 126.7, 126.5, 126.3, 125.3, 125.1, 122.5, 122.4, 118.5, 118.1, 116.2, 115.0, 54.7. HRMS [M]<sup>+</sup> Calculated for C<sub>26</sub>H<sub>14</sub>F<sub>3</sub>NO<sub>2</sub> 429.0977, found 429.0973.

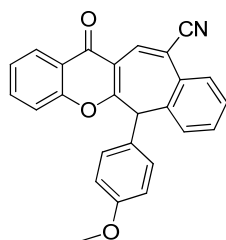

**6-(4-methoxyphenyl)-13-oxo-6,13-dihydrobenzo[5,6]cyclohepta[1,2-*b*]chromene-11-carbonitrile  
(3ca)**

As a white solid: m.p. 244-245 °C; IR (KBr)  $\nu_{\max}$  3432, 3037, 2926, 2829, 2218, 1645, 1566, 1510, 1464, 1400, 1254, 1178, 1038, 939, 835, 768, 669, 517  $\text{cm}^{-1}$ ;  $^1\text{H}$  NMR (300 MHz,  $\text{CDCl}_3$ )  $\delta$ : 8.26 (d,  $J = 8.0$  Hz, 1H), 7.91 (d,  $J = 7.7$  Hz, 1H), 7.72-7.78 (m, 2H), 7.45-7.64 (m, 5H), 7.63-7.73 (m, 4H), 5.45 (s, 1H), 3.74 (s, 1H).  $^{13}\text{C}$  NMR (100 MHz,  $\text{CDCl}_3$ )  $\delta$ : 175.8, 166.3, 158.8, 155.8, 136.5, 134.3, 133.9, 131.2, 131.0, 130.9, 128.8, 128.5, 127.6, 127.4, 126.4, 126.1, 122.5, 118.9, 118.1, 115.9, 114.9, 113.6, 55.1, 54.3. HRMS  $[\text{M}]^+$  Calculated for  $\text{C}_{26}\text{H}_{17}\text{NO}_3$  391.1208, found 391.1204.

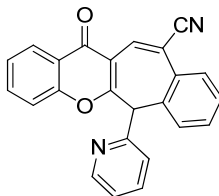

**13-oxo-6-(pyridin-2-yl)-6,13-dihydrobenzo[5,6]cyclohepta[1,2-*b*]chromene-11-carbonitrile (3da)**

As a light brown solid: m.p. 215-216 °C; IR (KBr)  $\nu_{\max}$  3425, 3036, 2924, 2218, 1720, 1651, 1568, 1466, 1400, 1223, 1175, 995, 908, 770, 673  $\text{cm}^{-1}$ ;  $^1\text{H}$  NMR (300 MHz,  $\text{CDCl}_3$ )  $\delta$ : 8.38 (d,  $J = 4.1$  Hz, 1H), 8.25 (dd,  $J = 1.7, 8.0$  Hz, 1H), 7.91 (d,  $J = 7.4$  Hz, 1H), 7.66-7.77 (m, 2H), 7.54-7.65 (m, 4H), 7.43-7.52 (m, 2H), 7.11 (dd,  $J = 4.7, 7.4$  Hz, 1H), 6.56 (d,  $J = 8.0$  Hz, 1H), 5.59 (s, 1H).  $^{13}\text{C}$  NMR (100 MHz,  $\text{CDCl}_3$ )  $\delta$ : 176.0, 165.9, 156.1, 156.0, 149.0, 136.3, 135.4, 134.6, 134.1, 131.2, 131.1, 128.7, 126.2, 125.9, 122.6, 122.4, 121.1, 118.7, 118.2, 115.9, 114.1, 57.5. HRMS  $[\text{M}]^+$  Calculated for  $\text{C}_{24}\text{H}_{14}\text{N}_2\text{O}_2$  362.1055, found 362.1057.

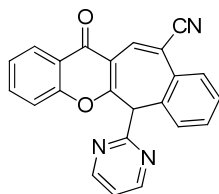

**13-oxo-6-(pyrimidin-2-yl)-6,13-dihydrobenzo[5,6]cyclohepta[1,2-*b*]chromene-11-carbonitrile (3ea)**

As a light yellow solid: m.p. 221-222 °C; IR (KBr)  $\nu_{\max}$  3431, 3037, 2222, 1641, 1562, 1464, 1402, 1213, 889, 770, 635  $\text{cm}^{-1}$ ;  $^1\text{H}$  NMR (300 MHz,  $\text{CDCl}_3$ )  $\delta$ : 9.06 (s, 1H), 8.19-8.29 (m, 3H), 7.94 (dd,  $J = 1.0, 7.7$  Hz, 1H), 7.73-7.82 (m, 2H), 7.67 (td,  $J = 1.4, 7.4$  Hz, 1H), 7.56-7.63 (m, 3H), 7.50 (td,  $J = 1.0, 7.4$  Hz, 1H), 5.49 (s, 1H).  $^{13}\text{C}$  NMR (100 MHz,  $\text{CDCl}_3$ )  $\delta$ : 175.2, 162.6, 158.1, 155.8, 154.8, 134.7, 133.9, 133.6, 131.9, 130.8, 129.7, 129.5, 129.4, 126.6, 126.5, 122.5, 118.0, 116.4, 115.3, 51.0. HRMS  $[\text{M}]^+$  Calculated for  $\text{C}_{23}\text{H}_{13}\text{N}_3\text{O}_2$  363.1008, found 363.1003.

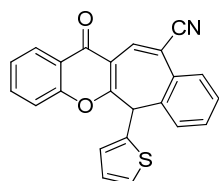

**13-oxo-6-(thiophen-2-yl)-6,13-dihydrobenzo[5,6]cyclohepta[1,2-*b*]chromene-11-carbonitrile (3fa)**

As a white solid: m.p. 208-209 °C; IR (KBr)  $\nu_{\max}$  3425, 3041, 2922, 2216, 1649, 1620, 1562, 1485, 1402, 1223, 1020, 847, 764, 717  $\text{cm}^{-1}$ ;  $^1\text{H}$  NMR (300 MHz,  $\text{CDCl}_3$ )  $\delta$ : 8.26 (d,  $J = 8.0$  Hz, 1H), 7.91 (d,  $J = 7.4$  Hz, 1H), 7.85 (s, 1H), 7.75 (t,  $J = 7.7$  Hz, 1H), 7.42-7.65 (m, 5H), 7.12 (d,  $J = 5.2$  Hz, 1H), 6.83 (t,  $J = 4.3$  Hz, 1H), 6.50 (s, 1H), 5.60 (s, 1H).  $^{13}\text{C}$  NMR (100 MHz,  $\text{CDCl}_3$ )  $\delta$ : 175.6, 155.8, 136.4, 134.4, 133.8, 131.3, 131.0, 130.2, 129.0, 128.9, 126.5, 126.4, 126.1, 124.9, 122.6, 118.8, 118.1, 116.1, 115.2, 51.5. HRMS  $[\text{M}]^+$  Calculated for  $\text{C}_{23}\text{H}_{13}\text{NO}_2\text{S}$  367.0667, found 367.0662.

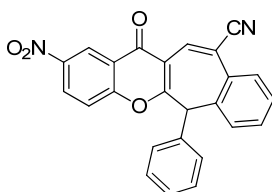

**2-nitro-13-oxo-6-phenyl-6,13-dihydrobenzo[5,6]cyclohepta[1,2-*b*]chromene-11-carbonitrile (3ga)**

As a light yellow solid: m.p. 277-278 °C; IR (KBr)  $\nu_{\max}$  3431, 3088, 2220, 1655, 1529, 1452, 1344, 1254, 1221, 1161, 908, 839, 746, 677  $\text{cm}^{-1}$ ;  $^1\text{H}$  NMR (300 MHz,  $\text{CDCl}_3$ )  $\delta$ : 9.13 (d,  $J = 2.8$  Hz, 1H), 8.58 (dd,  $J = 2.9, 9.2$  Hz, 1H), 7.94 (d,  $J = 7.7$  Hz, 1H), 7.76 (d,  $J = 9.3$  Hz, 1H), 7.63-7.70 (m, 2H), 7.56-7.62 (m, 1H), 7.54 (dd,  $J = 1.4, 7.4$  Hz, 1H), 7.14-7.23 (m, 3H), 6.71-6.76 (m, 2H), 5.54 (s, 1H).  $^{13}\text{C}$  NMR (100 MHz,  $\text{CDCl}_3$ )  $\delta$ : 174.4, 166.0, 158.6, 145.4, 136.1, 135.2, 132.5, 131.7, 131.1, 131.0, 129.2, 128.9, 128.6, 128.5, 127.9, 126.3, 123.1, 122.8, 120.0, 118.3, 116.5, 54.8. HRMS  $[\text{M}]^+$  Calculated for  $\text{C}_{25}\text{H}_{14}\text{N}_2\text{O}_4$  406.0954, found 406.0953.

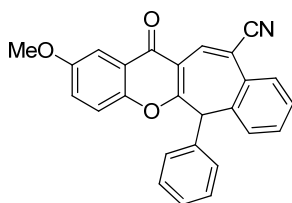

**2-methoxy-13-oxo-6-phenyl-6,13-dihydrobenzo[5,6]cyclohepta[1,2-*b*]chromene-11-carbonitrile (3ha)**

As a white solid: m.p. 267-268 °C; IR (KBr)  $\nu_{\max}$  3425, 2935, 2220, 1649, 1485, 1394, 1296, 1207, 1032, 895, 825, 764, 708  $\text{cm}^{-1}$ ;  $^1\text{H}$  NMR (300 MHz,  $\text{CDCl}_3$ )  $\delta$ : 7.91 (dd,  $J = 1.1, 7.7$  Hz, 1H), 7.74 (s, 1H), 7.59-7.65 (m, 2H), 7.56 (dd,  $J = 1.7, 7.3$  Hz, 1H), 7.32 (dd,  $J = 2.9, 8.9$  Hz, 1H), 7.13-7.20 (m, 3H), 6.69-6.75 (m, 2H), 5.49 (s, 1H), 3.91 (s, 3H).  $^{13}\text{C}$  NMR (100 MHz,  $\text{CDCl}_3$ )  $\delta$ : 175.6, 165.7, 157.5, 150.5, 136.1, 135.9, 134.1, 131.1, 131.0, 128.8, 128.5, 128.2, 127.5, 126.3, 124.2, 123.2, 119.5, 118.8, 115.3, 114.6, 56.0, 54.9. HRMS  $[\text{M}]^+$  Calculated for  $\text{C}_{26}\text{H}_{17}\text{NO}_3$  391.1208, found 391.1201.

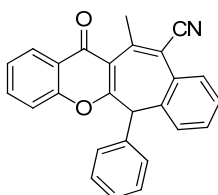

**12-methyl-13-oxo-6-phenyl-6,13-dihydrobenzo[5,6]cyclohepta[1,2-*b*]chromene-11-carbonitrile (3ia)**

As a white solid: m.p. 244-245 °C; IR (KBr)  $\nu_{\max}$  3431, 3057, 2929, 2214, 1647, 1556, 1466, 1389, 1338, 1223, 1138, 1065, 764, 710, 658  $\text{cm}^{-1}$ ;  $^1\text{H}$  NMR (300 MHz,  $\text{CDCl}_3$ )  $\delta$ : 8.21 (dd,  $J = 1.4, 8.0$  Hz, 1H), 7.67-7.77 (m, 2H), 7.48-7.57 (m, 4H), 7.44 (dd,  $J = 1.4, 7.4$  Hz, 1H), 7.18-7.24 (m, 3H), 6.80-6.87 (m, 2H), 5.41 (s, 1H), 2.34 (s, 3H).  $^{13}\text{C}$  NMR (100 MHz,  $\text{CDCl}_3$ )  $\delta$ : 176.0, 166.9, 155.3, 148.1, 139.2, 136.4, 134.0, 131.4, 130.0, 129.5, 128.5, 128.4, 127.5, 126.3, 125.8, 123.3, 117.8, 117.6, 117.2, 114.5, 55.0, 21.8. HRMS  $[\text{M}]^+$  Calculated for  $\text{C}_{26}\text{H}_{17}\text{NO}_2$  375.1259, found 375.1254.

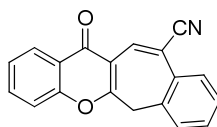

**13-oxo-6,13-dihydrobenzo[5,6]cyclohepta[1,2-*b*]chromene-11-carbonitrile (3ja)**

As a light yellow solid: m.p. 173-174 °C; IR (KBr)  $\nu_{\max}$  3425, 3039, 2214, 1734, 1643, 1556, 1460, 1402, 1360, 1217, 1155, 1020, 766, 683, 635  $\text{cm}^{-1}$ ;  $^1\text{H}$  NMR (300 MHz,  $\text{CDCl}_3$ )  $\delta$ : 8.22 (dd,  $J = 1.7, 8.0$  Hz, 1H), 8.07 (s, 1H), 7.80 (d,  $J = 7.7$  Hz, 1H), 7.69 (td,  $J = 1.7, 7.2$  Hz, 1H), 7.38-7.54 (m, 5H), 3.79 (s, 2H).  $^{13}\text{C}$  NMR (100 MHz,  $\text{CDCl}_3$ )  $\delta$ : 174.9, 162.2, 155.7, 135.9, 134.1, 133.2, 131.6, 131.1, 128.9, 128.0, 127.5, 126.3, 125.9, 122.6, 119.0, 117.9, 116.2, 115.1, 38.9. HRMS  $[\text{M}]^+$  Calculated for  $\text{C}_{19}\text{H}_{11}\text{NO}_2$  285.0790, found 285.0789.

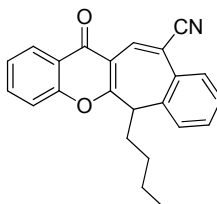

**6-butyl-13-oxo-6,13-dihydrobenzo[5,6]cyclohepta[1,2-*b*]chromene-11-carbonitrile (3ka)**

As a white solid: m.p. 161-162 °C; IR (KBr)  $\nu_{\max}$  3431, 3049, 2955, 2862, 2216, 1637, 1616, 1554, 1466, 1400, 1227, 770  $\text{cm}^{-1}$ ;  $^1\text{H}$  NMR (300 MHz,  $d_6$ -DMSO, TEMP=70 °C)  $\delta$ : 8.06 (dd,  $J = 1.3, 7.8$  Hz, 1H), 7.86 (s, 1H), 7.81 (td,  $J = 1.6, 7.8$  Hz, 1H), 7.72 (d,  $J = 7.9$  Hz, 1H), 7.66 (d,  $J = 8.3$  Hz, 1H), 7.58 (t,  $J = 7.0$  Hz, 1H), 7.46-7.54 (m, 3H), 4.20 (s, 1H), 1.51-1.79 (m, 2H), 0.98-1.35 (m, 4H), 0.75 (s, 3H).  $^{13}\text{C}$  NMR (100 MHz,  $d_6$ -DMSO)  $\delta$ : 174.6, 167.3, 155.3, 137.1, 134.9, 133.9, 131.5, 131.1, 129.2, 128.2, 128.0, 126.3, 125.5, 121.6, 119.1, 118.4, 114.7, 113.3, 50.6, 28.7, 27.7, 21.5, 13.6. HRMS  $[\text{M}]^+$  Calculated for  $\text{C}_{23}\text{H}_{19}\text{NO}_2$  341.1416, found 341.1414.

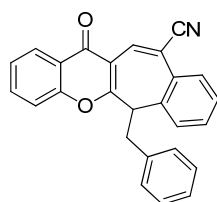

**6-benzyl-13-oxo-6,13-dihydrobenzo[5,6]cyclohepta[1,2-*b*]chromene-11-carbonitrile (3la)**

As a white solid: m.p. 179-180 °C; IR (KBr)  $\nu_{\max}$  3429, 3030, 2924, 2858, 2218, 1641, 1564, 1464, 1406, 1346, 1225, 1180, 1022, 920, 760, 702, 503  $\text{cm}^{-1}$ ;  $^1\text{H}$  NMR (300 MHz,  $d_6$ -DMSO, TEMP=70 °C)  $\delta$ : 8.05 (d,  $J = 7.8$  Hz, 1H), 7.98 (s, 1H), 7.74-7.84 (m, 2H), 7.37-7.60 (m, 5H), 6.97-7.24 (m, 5H), 4.55 (s, 1H), 2.81-3.09 (m, 2H).  $^{13}\text{C}$  NMR (100 MHz,  $d_6$ -DMSO)  $\delta$ : 174.6, 166.2, 155.2, 137.2, 136.4, 134.9, 133.9, 131.4, 131.3, 131.2, 129.5, 129.0, 128.8, 128.3, 128.1, 128.0, 126.5, 126.2, 125.4, 121.4, 119.2, 118.1, 115.3, 113.5, 52.5, 33.6. HRMS  $[\text{M}]^+$  Calculated for  $\text{C}_{26}\text{H}_{17}\text{NO}_2$  375.1259, found 375.1264.

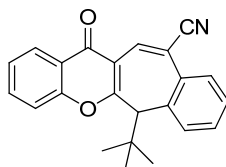

### 6-(tert-butyl)-13-oxo-6,13-dihydrobenzo[5,6]cyclohepta[1,2-*b*]chromene-11-carbonitrile(3ma)

As a white solid: m.p. 194-195 °C; IR (KBr)  $\nu_{\max}$  3431, 2964, 2868, 2210, 1649, 1620, 1564, 1465, 1402, 1221, 1157, 906, 770  $\text{cm}^{-1}$ ;  $^1\text{H}$  NMR (300 MHz,  $\text{CDCl}_3$ )  $\delta$ : 8.24 (dd,  $J = 1.6, 8.0$  Hz, 1H), 7.95 (s, 1H), 7.89 (d,  $J = 7.8$  Hz, 1H), 7.70 (t,  $J = 7.3$  Hz, 1H), 7.39-7.55 (m, 4H), 7.23 (d,  $J = 7.8$  Hz, 1H), 3.64 (s, 1H), 0.91 (s, 9H).  $^{13}\text{C}$  NMR (100 MHz,  $\text{CDCl}_3$ )  $\delta$ : 175.6, 164.9, 155.7, 134.4, 134.3, 133.8, 133.4, 131.0, 130.9, 128.8, 128.1, 126.3, 125.8, 122.1, 119.5, 118.0, 117.3, 115.7, 63.1, 40.2, 28.4. HRMS  $[\text{M}]^+$  Calculated for  $\text{C}_{23}\text{H}_{19}\text{NO}_2$  341.1416, found 341.1421.

## 2.2 3ab-3af

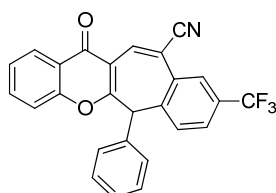

### 13-oxo-6-phenyl-9-(trifluoromethyl)-6,13-dihydrobenzo[5,6]cyclohepta[1,2-*b*]chromene-11-carbonitrile (3ab)

As a white solid: m.p. 212-213 °C; IR (KBr)  $\nu_{\max}$  3429, 3049, 2222, 1653, 1618, 1564, 1462, 1392, 1319, 1126, 764, 710  $\text{cm}^{-1}$ ;  $^1\text{H}$  NMR (300 MHz,  $\text{CDCl}_3$ )  $\delta$ : 8.27 (dd,  $J = 1.4, 8.0$  Hz, 1H), 8.15 (s, 1H), 7.88 (d,  $J = 8.0$  Hz, 1H), 7.83 (s, 1H), 7.77 (td,  $J = 1.7, 7.2$  Hz, 1H), 7.68 (d,  $J = 8.3$  Hz, 1H), 7.59 (d,  $J = 8.5$  Hz, 1H), 7.51 (t,  $J = 7.2$  Hz, 1H), 7.18-7.24 (m, 3H), 6.70-6.76 (m, 2H), 5.59 (s, 1H).  $^{13}\text{C}$  NMR (100 MHz,  $\text{CDCl}_3$ )  $\delta$ : 175.5, 165.6, 155.9, 139.5, 135.6, 134.8, 134.6, 131.8, 131.4, 131.1, 128.6, 128.0, 127.7, 126.6, 126.4, 126.3, 125.8, 122.6, 118.1, 116.3, 113.9, 54.8. HRMS  $[\text{M}]^+$  Calculated for  $\text{C}_{26}\text{H}_{14}\text{F}_3\text{NO}_2$  429.0977, found 429.0975.

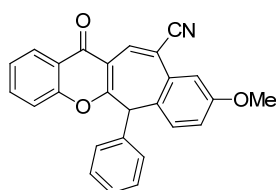

**9-methoxy-13-oxo-6-phenyl-6,13-dihydrobenzo[5,6]cyclohepta[1,2-*b*]chromene-11-carbonitrile  
(3ac)**

As a white solid: m.p. 229-230 °C; IR (KBr)  $\nu_{\max}$  3431, 3054, 2937, 2837, 2224, 1726, 1651, 1610, 1572, 1498, 1464, 1265, 1217, 1034, 858, 762  $\text{cm}^{-1}$ ;  $^1\text{H}$  NMR (300 MHz,  $\text{CDCl}_3$ )  $\delta$ : 8.26 (dd,  $J = 1.7, 8.0$  Hz, 1H), 7.70-7.79 (m, 2H), 7.58 (d,  $J = 8.5$  Hz, 1H), 7.48 (t,  $J = 7.6$  Hz, 1H), 7.41 (d,  $J = 8.5$  Hz, 1H), 7.37 (d,  $J = 2.8$  Hz, 1H), 7.15-7.20 (m, 4H), 6.73-6.79 (m, 2H), 5.45 (s, 1H), 3.90 (s, 3H).  $^{13}\text{C}$  NMR (100 MHz,  $\text{CDCl}_3$ )  $\delta$ : 175.8, 166.6, 159.6, 155.9, 136.3, 134.3, 134.2, 132.3, 132.2, 128.7, 128.3, 127.5, 126.5, 126.3, 126.1, 122.6, 118.8, 118.1, 117.9, 115.9, 114.8, 112.9, 55.6, 54.2. HRMS  $[\text{M}]^+$  Calculated for  $\text{C}_{26}\text{H}_{17}\text{NO}_3$  391.1208, found 391.1207.

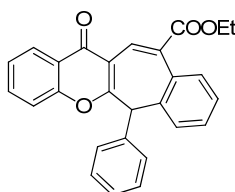

**Ethyl 13-oxo-6-phenyl-6,13-dihydrobenzo[5,6]cyclohepta[1,2-*b*]chromene-11-carboxylate (3ad)**

As a white solid: m.p. 172-173 °C; IR (KBr)  $\nu_{\max}$  3431, 2991, 2220, 1709, 1657, 1464, 1402, 1246, 1113, 1028, 905, 760, 704, 611  $\text{cm}^{-1}$ ;  $^1\text{H}$  NMR (300 MHz,  $\text{CDCl}_3$ )  $\delta$ : 8.25 (dd,  $J = 1.7, 7.9$  Hz, 1H), 7.94 (s, 1H), 7.64-7.75 (m, 2H), 7.56 (d,  $J = 8.4$  Hz, 1H), 7.39-7.53 (m, 4H), 7.08-7.17 (m, 3H), 6.79-6.92 (m, 2H), 5.47 (s, 1H), 4.24 (q,  $J = 7.0$  Hz, 2H), 1.26 (t,  $J = 7.0$  Hz, 3H).  $^{13}\text{C}$  NMR (100 MHz,  $\text{CDCl}_3$ )  $\delta$ : 176.7, 166.5, 166.4, 155.9, 137.8, 136.2, 133.9, 133.3, 132.6, 130.8, 129.9, 129.5, 128.5, 127.9, 127.3, 127.0, 126.5, 126.2, 125.6, 122.8, 118.0, 116.1, 61.0, 55.2, 14.2. HRMS  $[\text{M}]^+$  Calculated for  $\text{C}_{27}\text{H}_{20}\text{NaO}_4$  431.1259, found 431.1265.

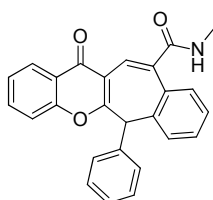

**N-methyl-13-oxo-6-phenyl-6,13-dihydrobenzo[5,6]cyclohepta[1,2-*b*]chromene-11-carboxamide  
(3ae)**

As a light yellow solid: m.p. 183-184 °C; IR (KBr)  $\nu_{\max}$  3433, 3248, 3057, 2931, 1651, 1543, 1466, 1400, 1300, 1219, 1157, 764, 702, 611  $\text{cm}^{-1}$ ;  $^1\text{H}$  NMR (300 MHz,  $\text{CDCl}_3$ )  $\delta$ : 8.23 (dd,  $J = 1.7, 8.0$  Hz, 1H), 7.66-7.74 (m, 2H), 7.55 (d,  $J = 8.3$  Hz, 1H), 7.47-7.53 (m, 2H), 7.39-7.46 (m, 2H), 7.33 (s, 1H), 7.12-7.19 (m, 3H), 6.85-6.95 (m, 2H), 5.65 (br. s., 1H), 5.45 (s, 1H), 2.82 (d,  $J = 5.0$  Hz, 3H).  $^{13}\text{C}$  NMR (100 MHz,  $\text{CDCl}_3$ )  $\delta$ : 176.9, 169.3, 164.5, 156.0, 138.5, 138.0, 136.7, 133.8, 132.8, 130.3, 129.9, 129.7, 128.0, 127.8, 127.2, 126.6, 126.2, 125.6, 122.8, 122.4, 118.0, 116.1, 55.1, 26.6. HRMS  $[\text{M}]^+$  Calculated for  $\text{C}_{26}\text{H}_{19}\text{NO}_3$  393.1365, found 393.1361.



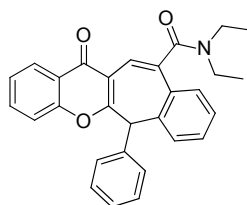

**N,N-diethyl-13-oxo-6-phenyl-6,13-dihydrobenzo[5,6]cyclohepta[1,2-*b*]chromene-11-carboxamide  
(3af)**

As a white solid: m.p. 197-198 °C; IR (KBr)  $\nu_{\max}$  3442, 2972, 1637, 1466, 1402, 1277, 1221, 1165, 762, 706, 600  $\text{cm}^{-1}$ ;  $^1\text{H}$  NMR (300 MHz,  $\text{CDCl}_3$ )  $\delta$ : 8.27 (dd,  $J = 1.5, 8.0$  Hz, 1H), 7.68 (td,  $J = 1.7, 7.1$  Hz, 1H), 7.49-7.62 (m, 4H), 7.38-7.46 (m, 2H), 7.13-7.20 (m, 4H), 6.89-6.98 (m, 2H), 5.50 (s, 1H), 3.43 (q,  $J = 7.0$  Hz, 2H), 2.51 (s, 2H), 1.17 (t,  $J = 7.0$  Hz, 3H), 0.66 (s, 3H).  $^{13}\text{C}$  NMR (100 MHz,  $\text{CDCl}_3$ )  $\delta$ : 176.5, 169.8, 156.0, 138.3, 136.8, 136.2, 133.7, 132.6, 131.4, 130.0, 128.5, 128.2, 128.1, 127.2, 126.7, 126.3, 125.4, 122.7, 119.7, 118.0, 117.2, 55.5, 42.2, 38.7, 13.8, 12.6. HRMS  $[\text{M}]^+$  Calculated for  $\text{C}_{29}\text{H}_{25}\text{NO}_3$  435.1834, found 435.1835.

**2.3 4b**

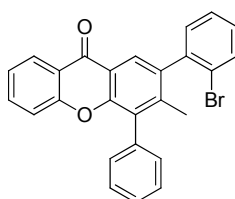

**2-(2-bromophenyl)-3-methyl-4-phenyl-9H-xanthen-9-one (4b)**

As a white solid: m.p. 185-186 °C;  $^1\text{H}$  NMR (300 MHz,  $\text{CDCl}_3$ )  $\delta$ : 8.33 (dd,  $J = 1.7, 7.9$  Hz, 1H), 8.15 (s, 1H), 7.69 (d,  $J = 8.0$  Hz, 1H), 7.63 (td,  $J = 1.6, 7.7$  Hz, 1H), 7.26-7.58 (m, 9H), 7.23 (d,  $J = 8.8$  Hz, 1H), 2.01 (s, 3H).  $^{13}\text{C}$  NMR (100 MHz,  $\text{CDCl}_3$ )  $\delta$ : 177.3, 156.1, 153.0, 143.0, 141.5, 137.9, 135.5, 134.5, 132.6, 131.3, 131.1, 130.3, 130.0, 129.2, 128.4, 128.3, 127.6, 127.4, 126.4, 126.0, 124.0, 123.8, 121.5, 119.5, 118.2, 18.9. HRMS  $[\text{M}]^+$  Calculated for  $\text{C}_{26}\text{H}_{17}\text{BrO}_2\text{Na}$  463.0310, found 463.0298.

**3.  $^1\text{H}$  NMR and  $^{13}\text{C}$  NMR spectra**

**3aa**

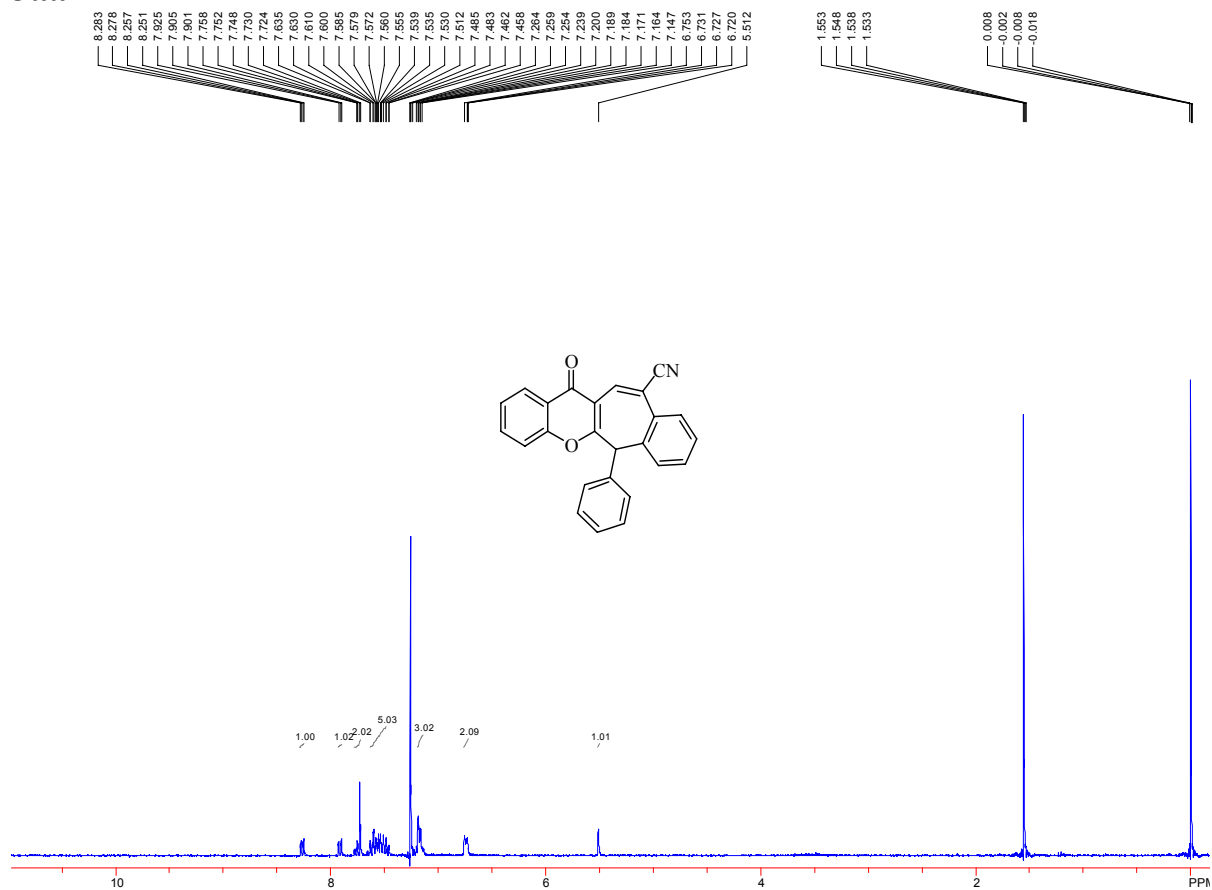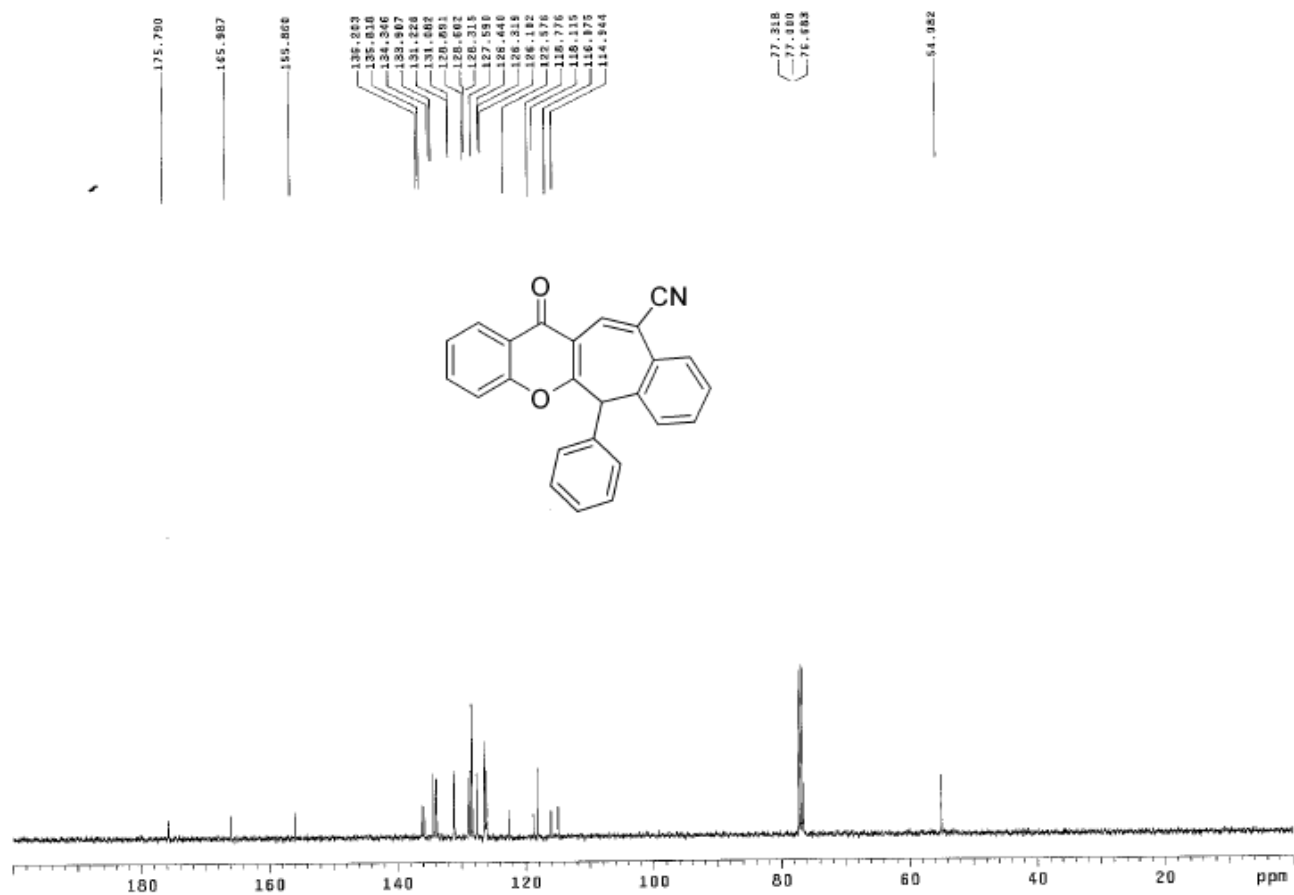

**3ba**

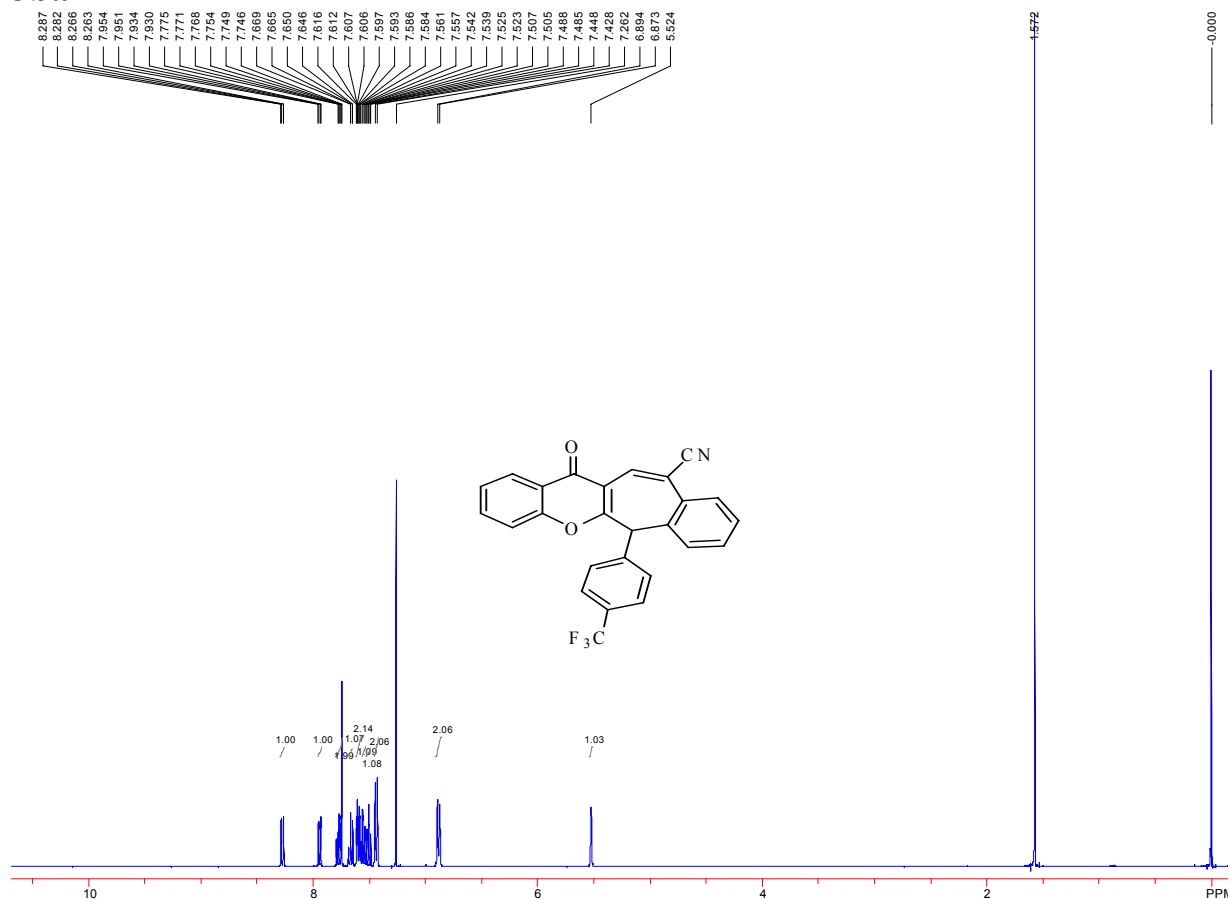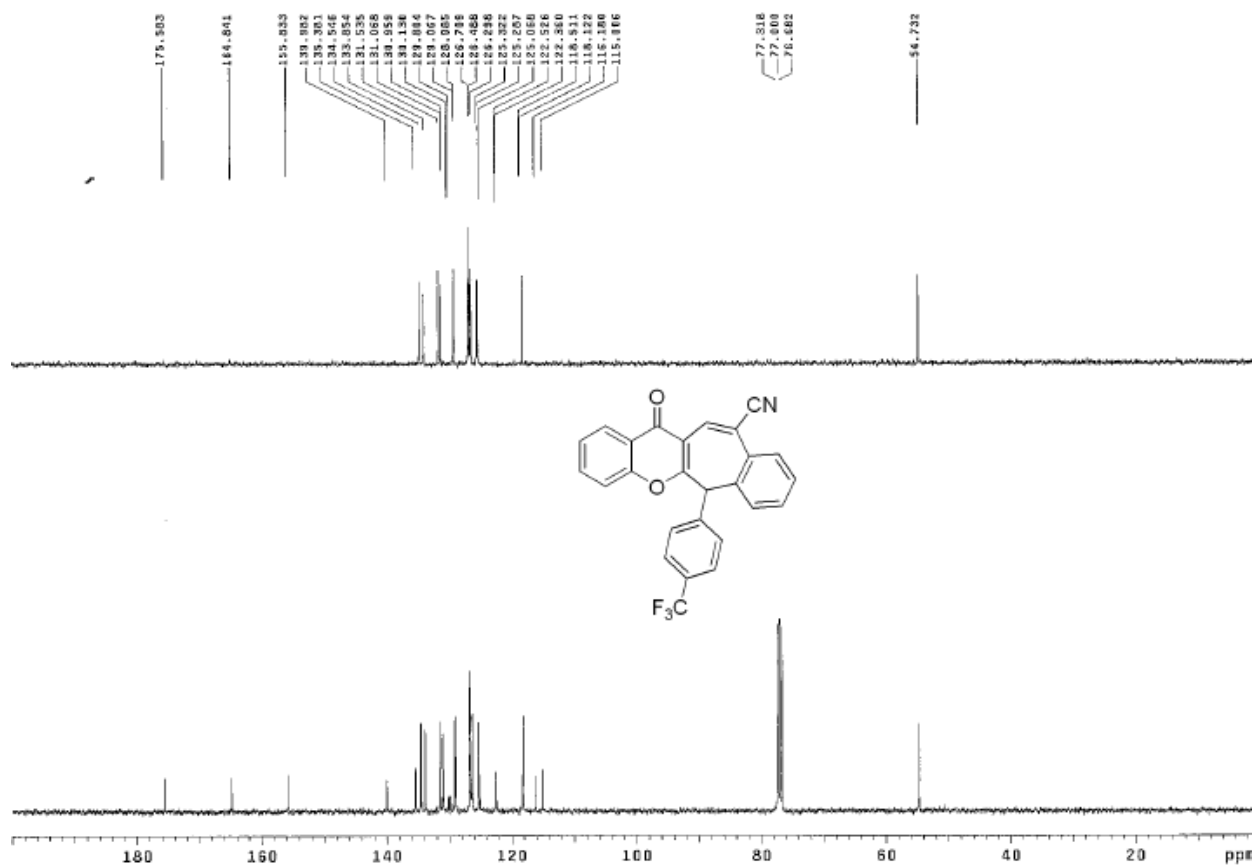

**3ca**

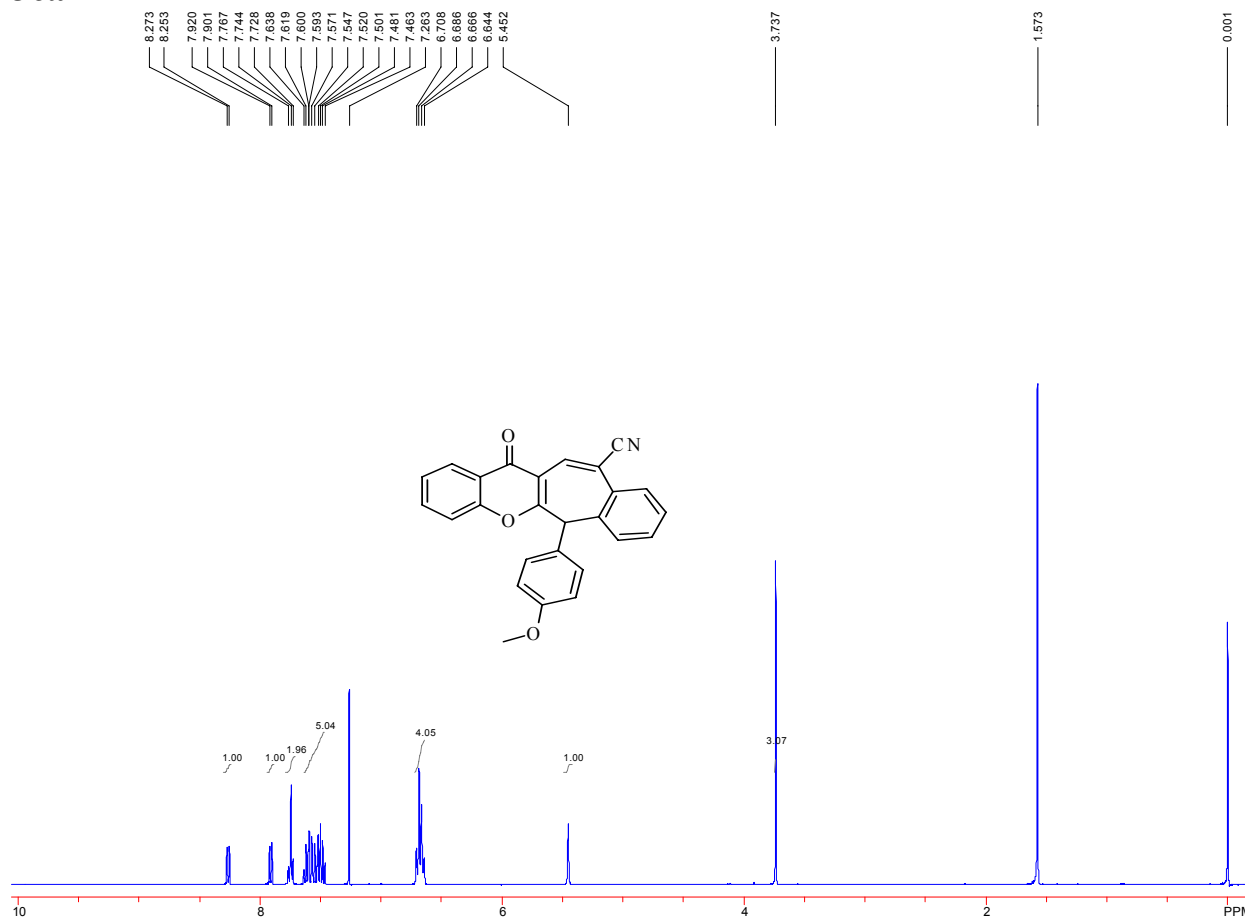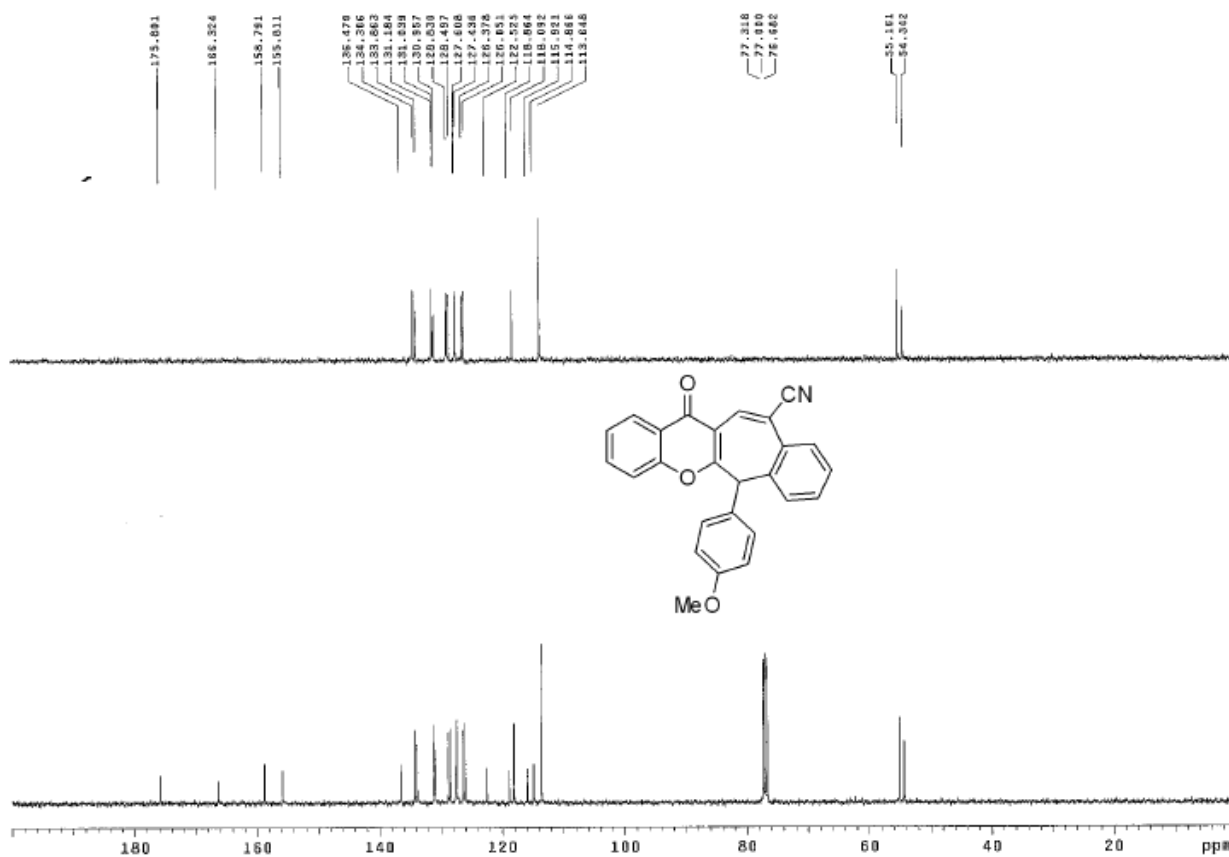

### 3da

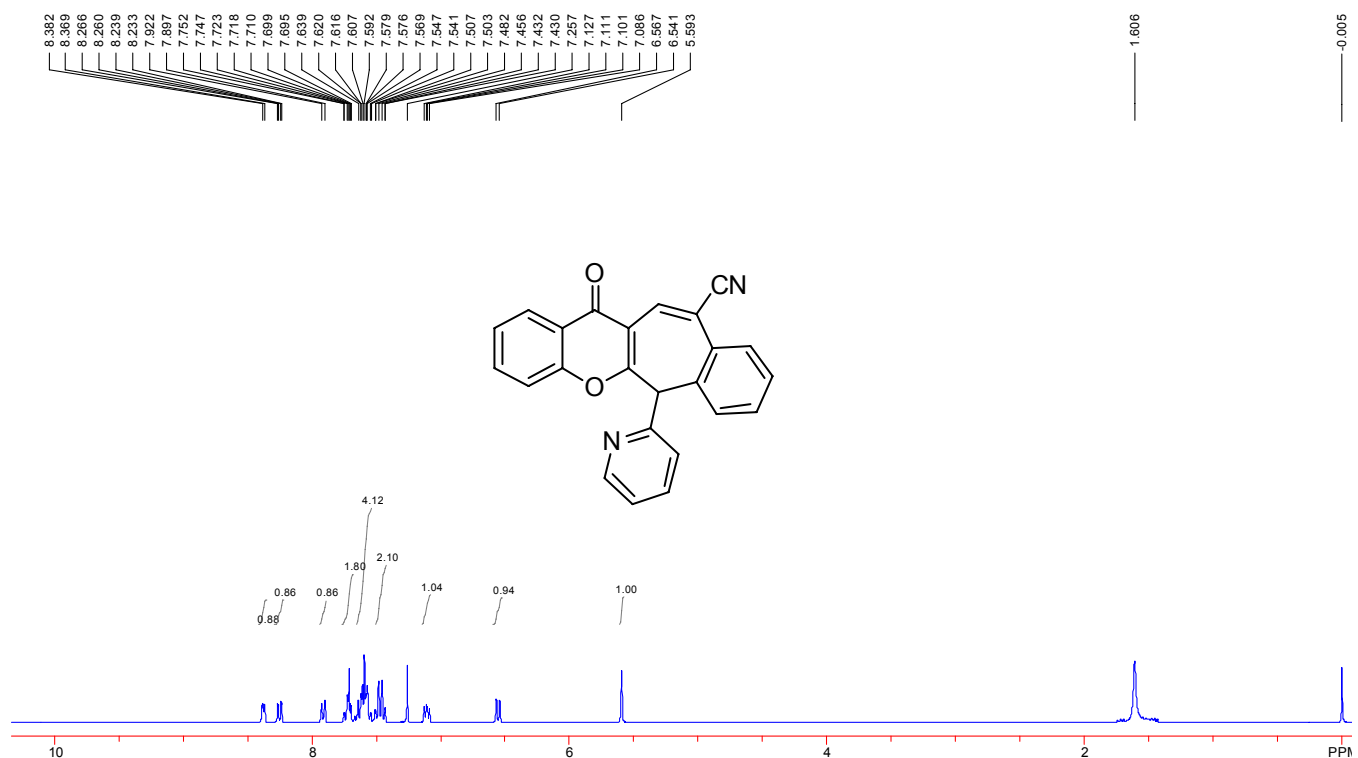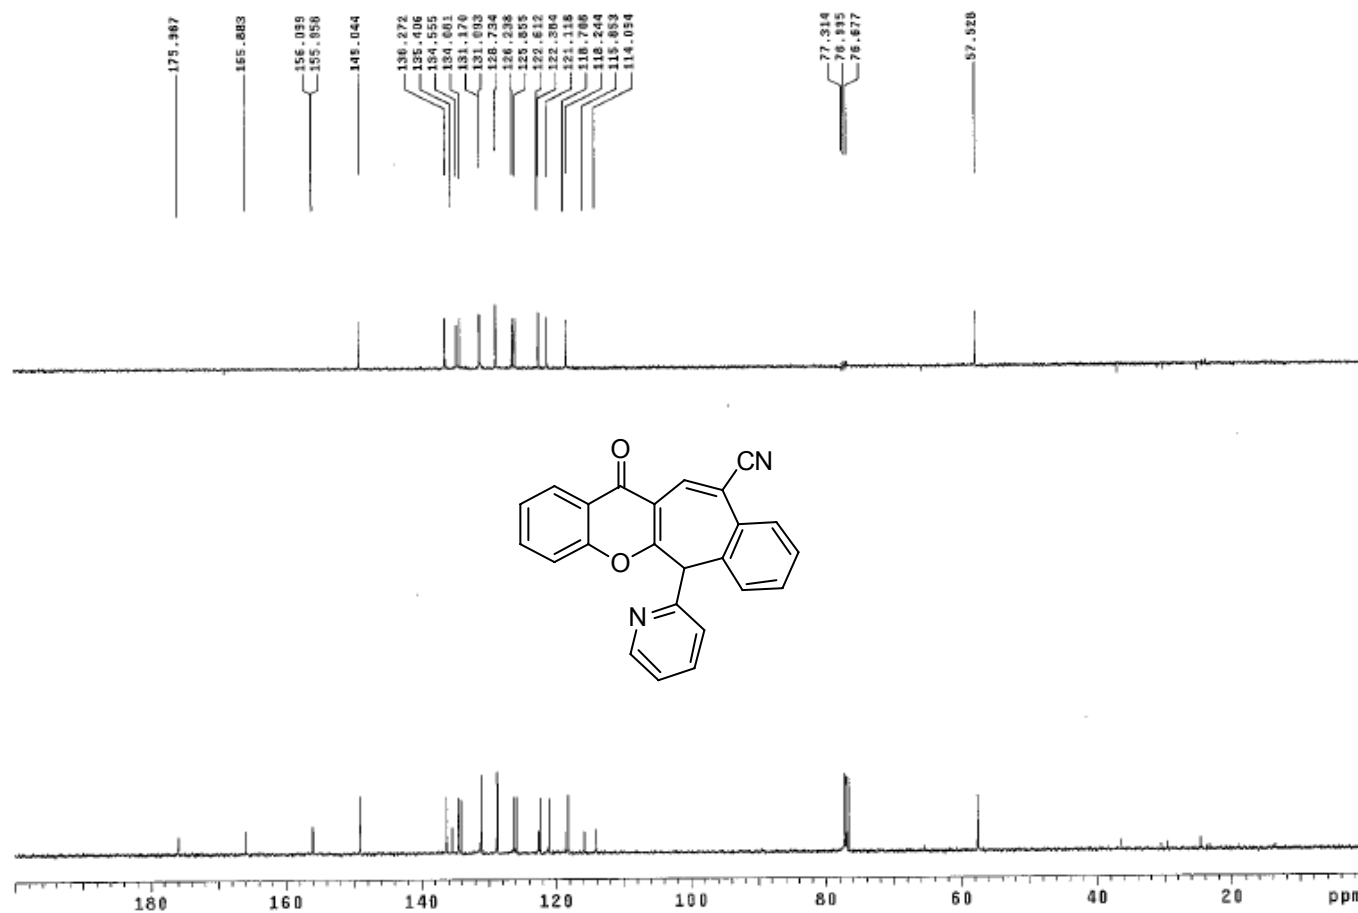

3ea

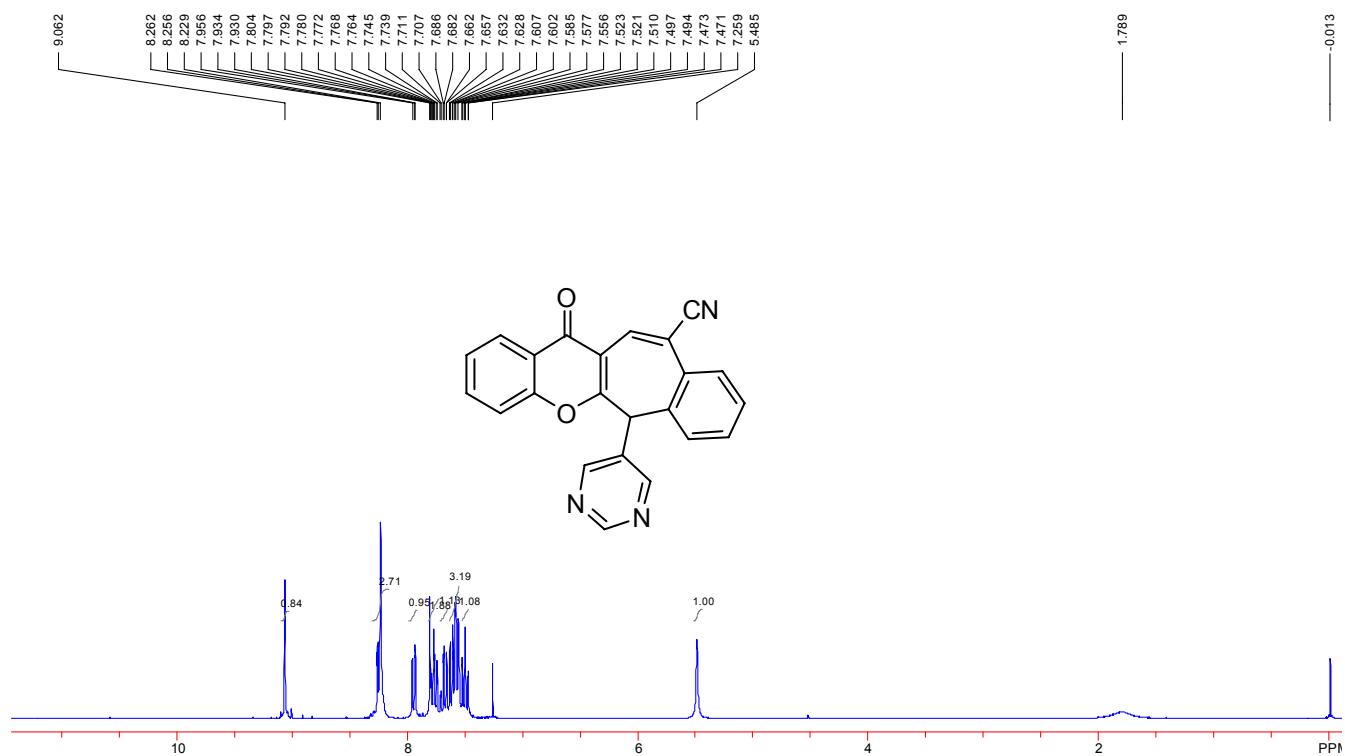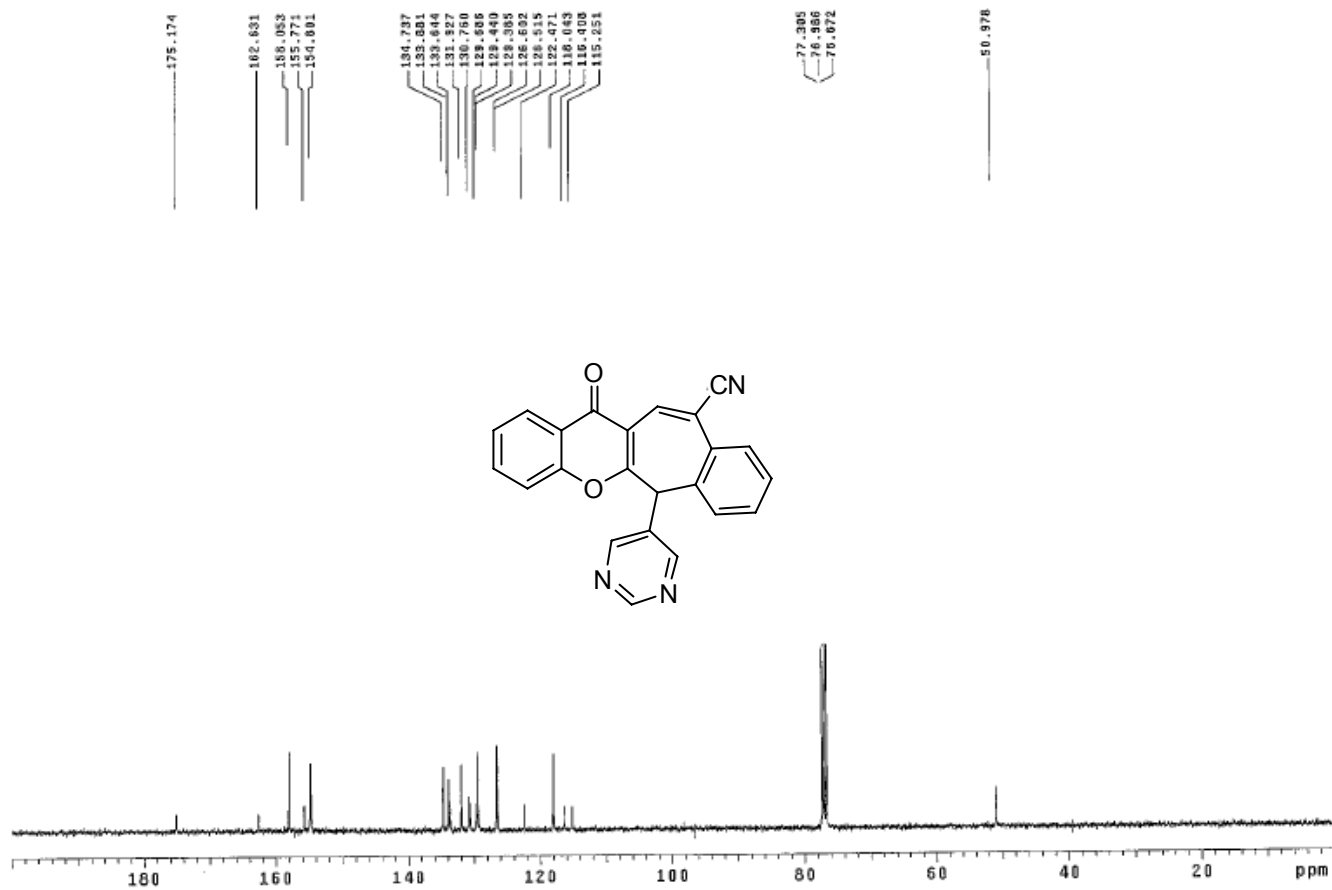

**3fa**

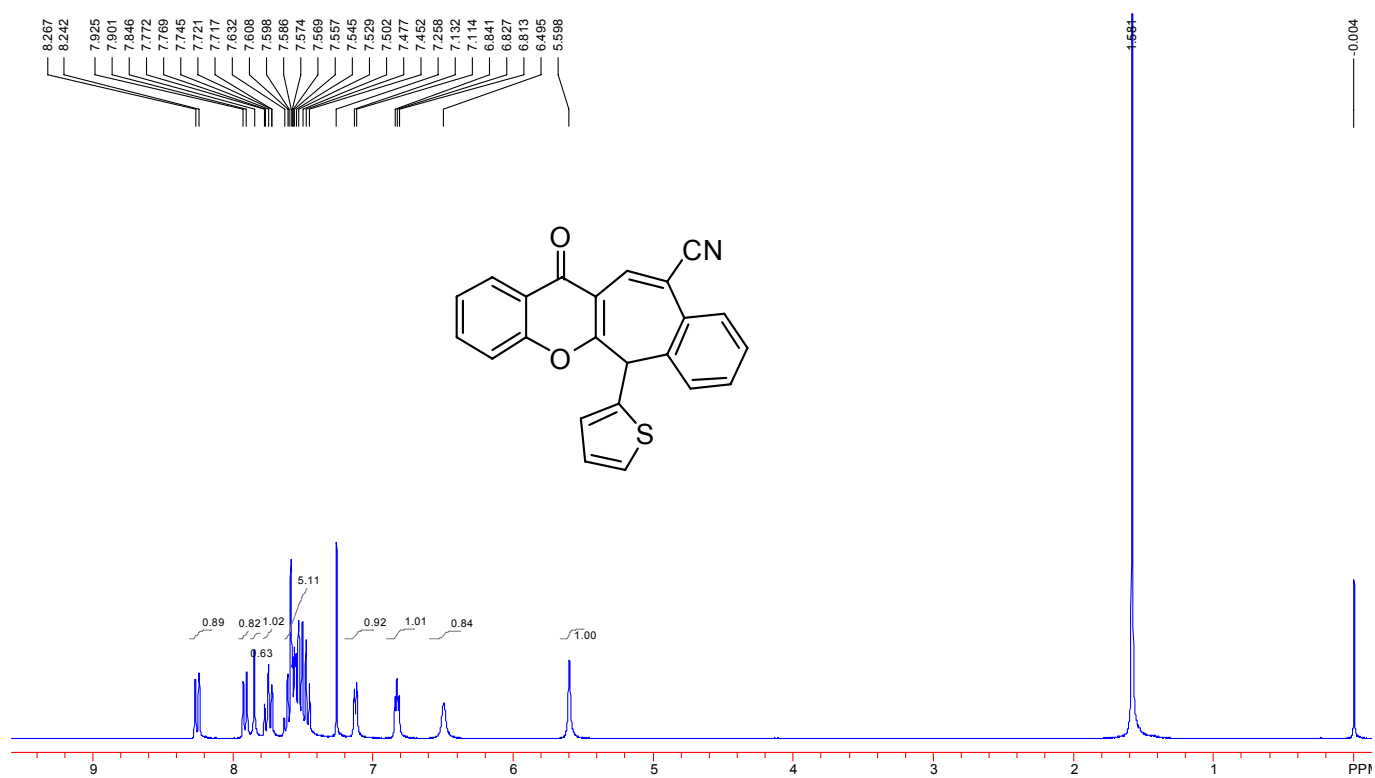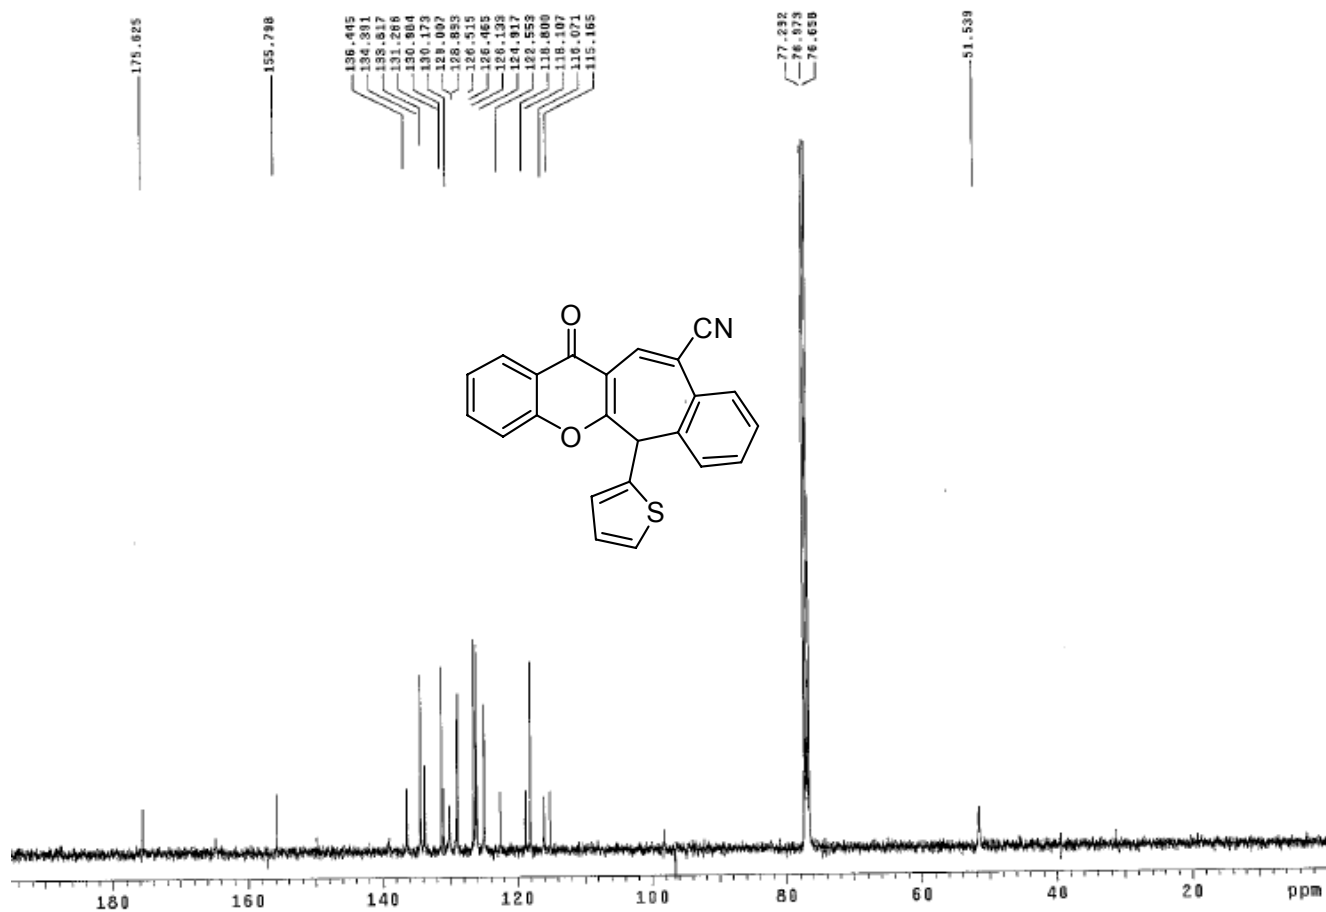

### 3ga

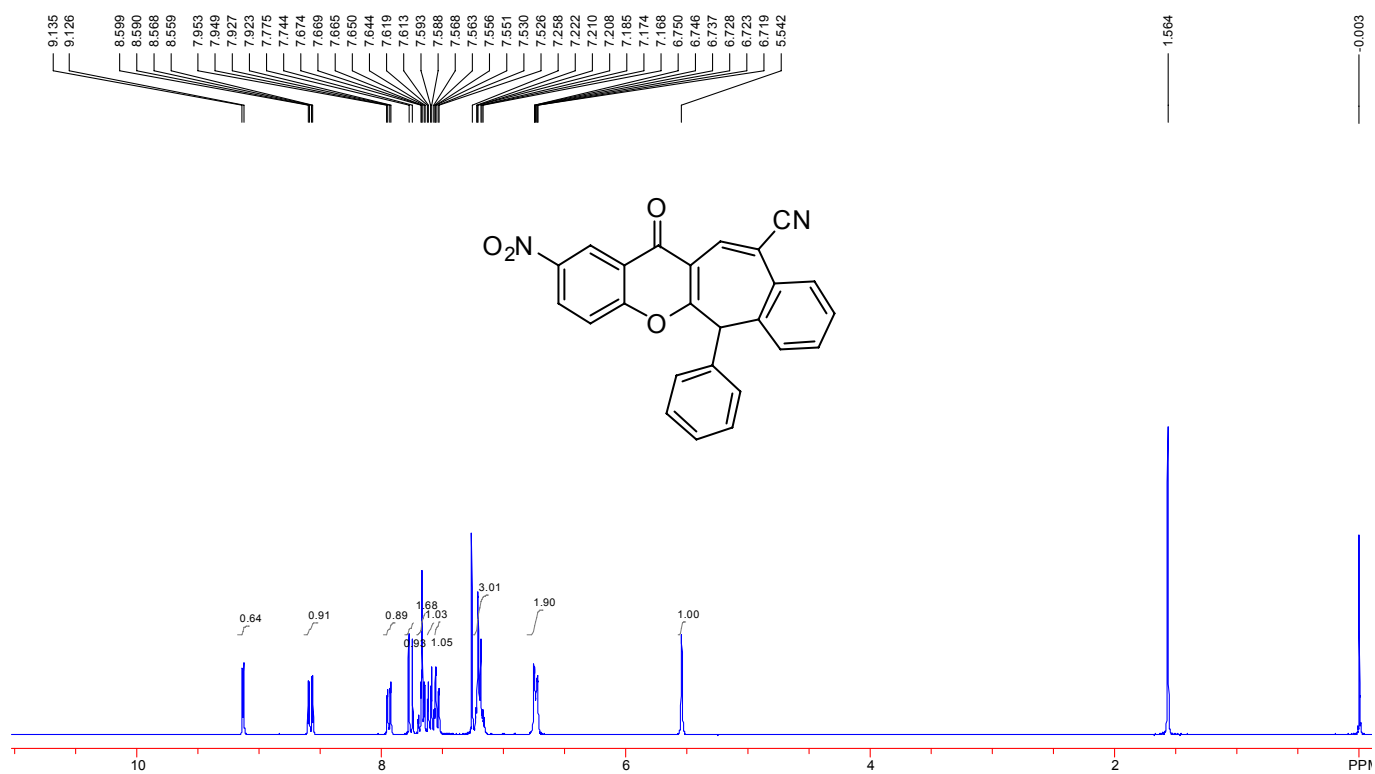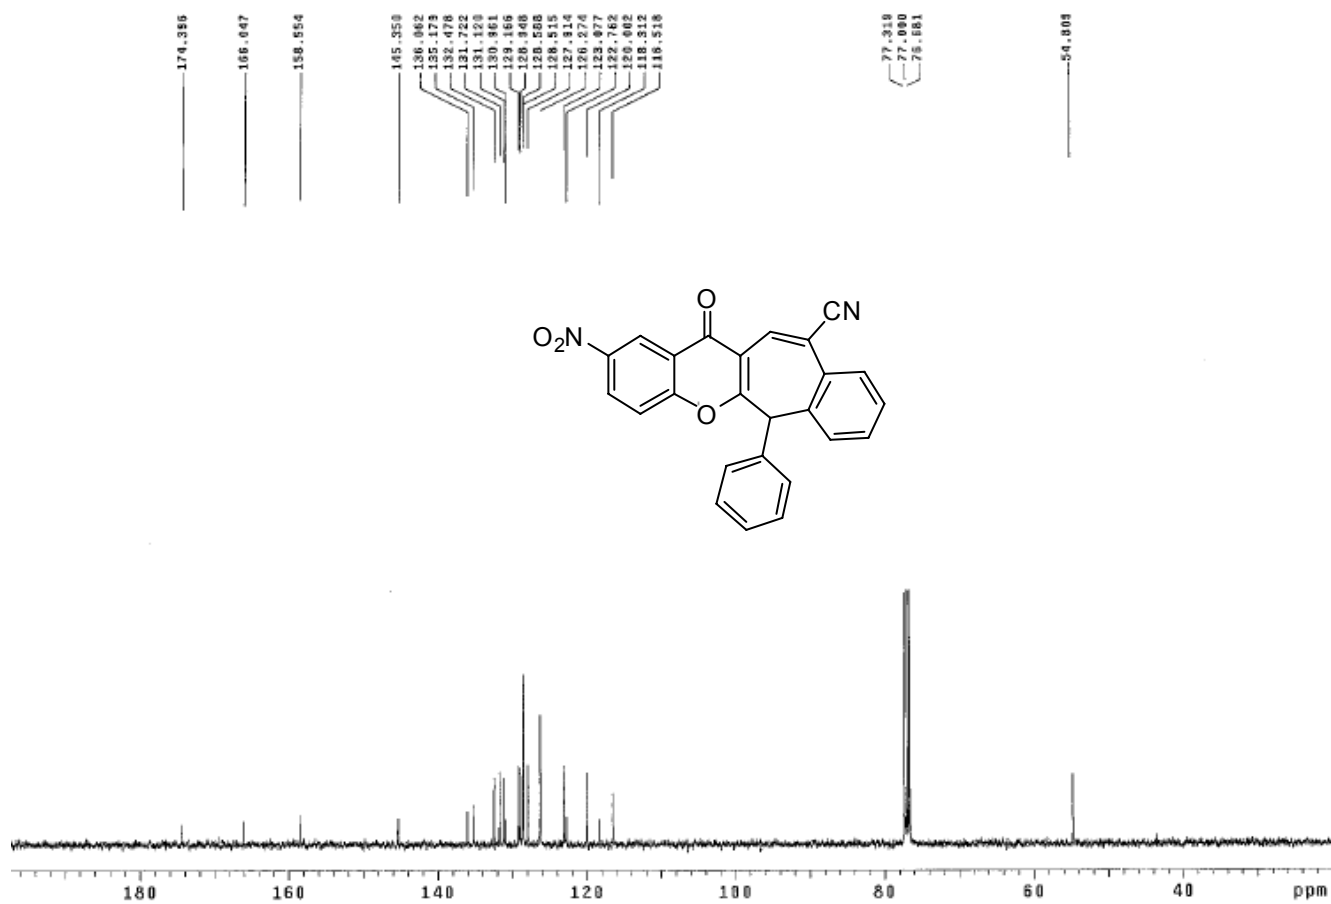



### 3ha

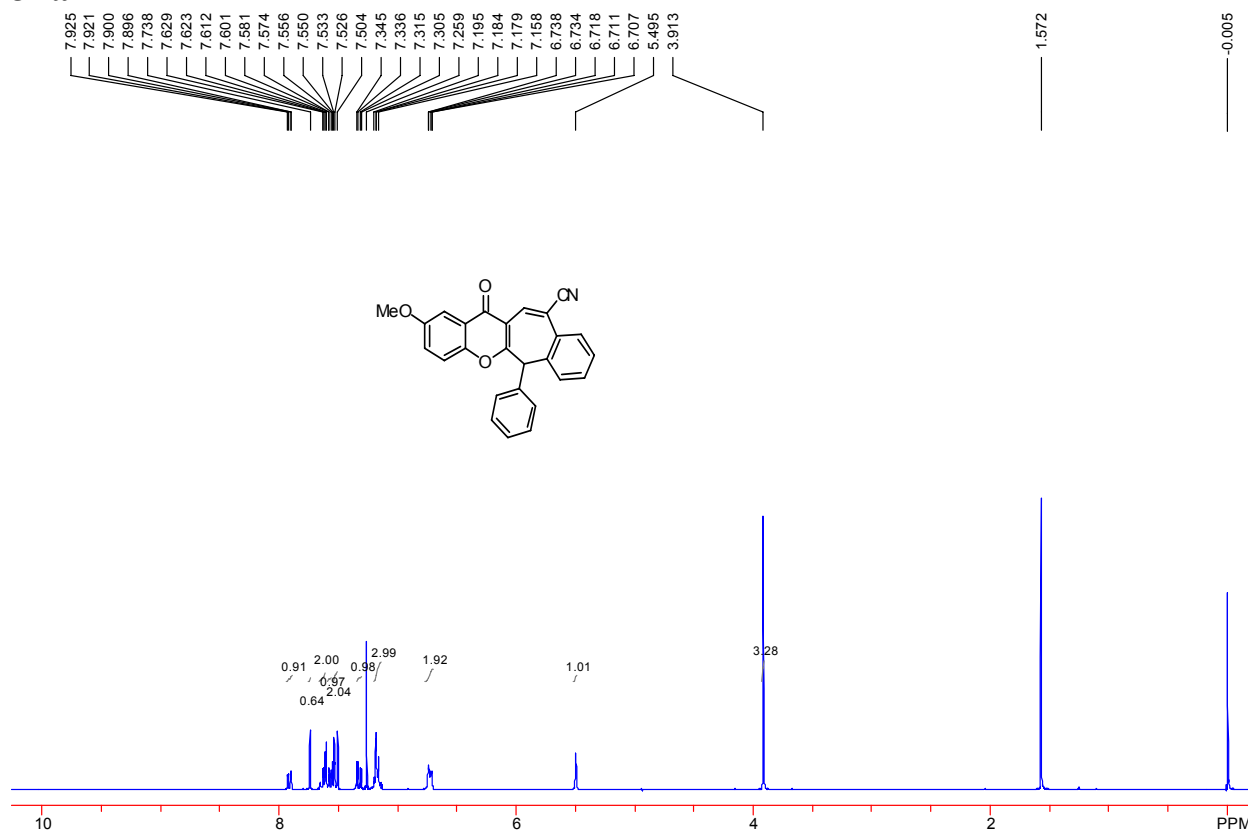

LY6-059 CDCl3 13C-85 091116

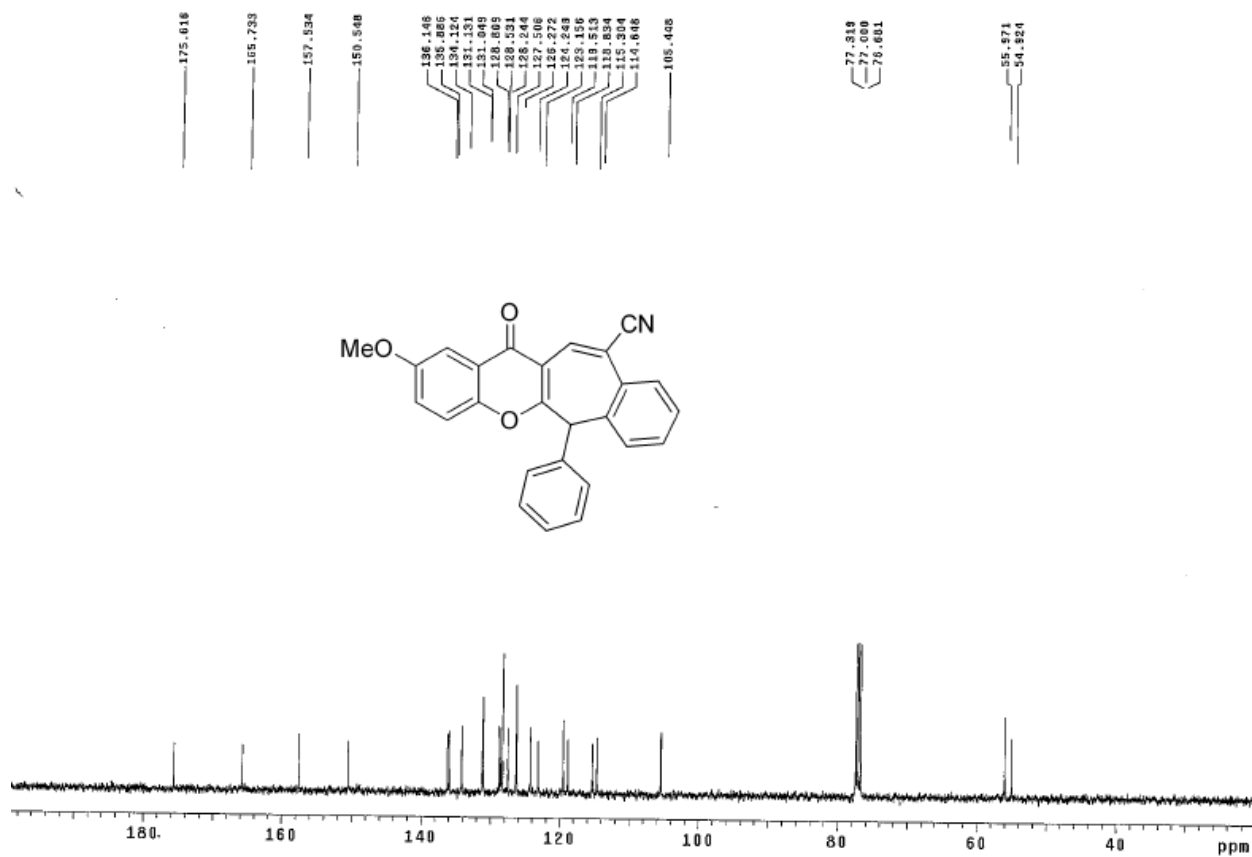

3ia

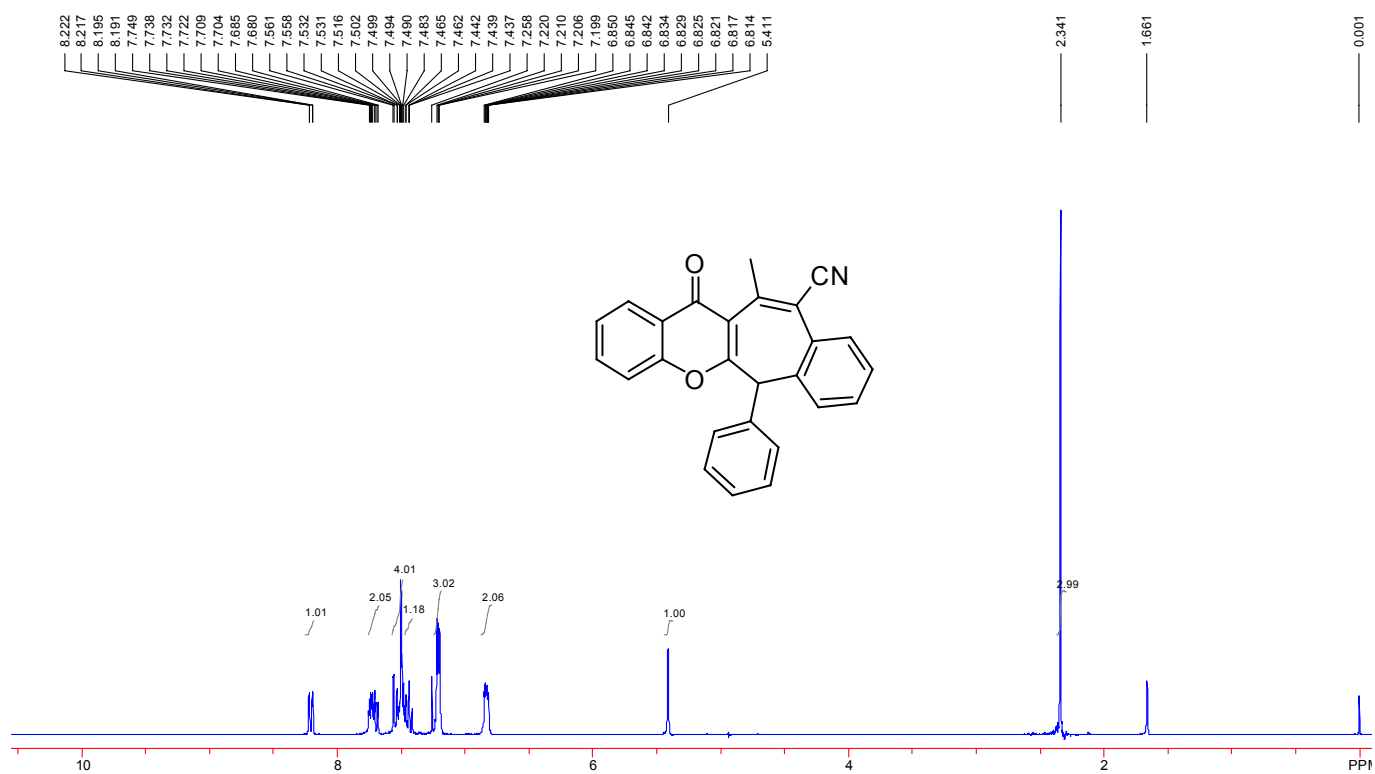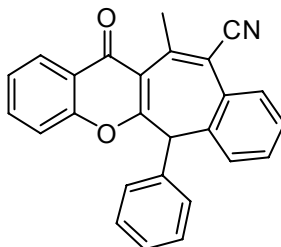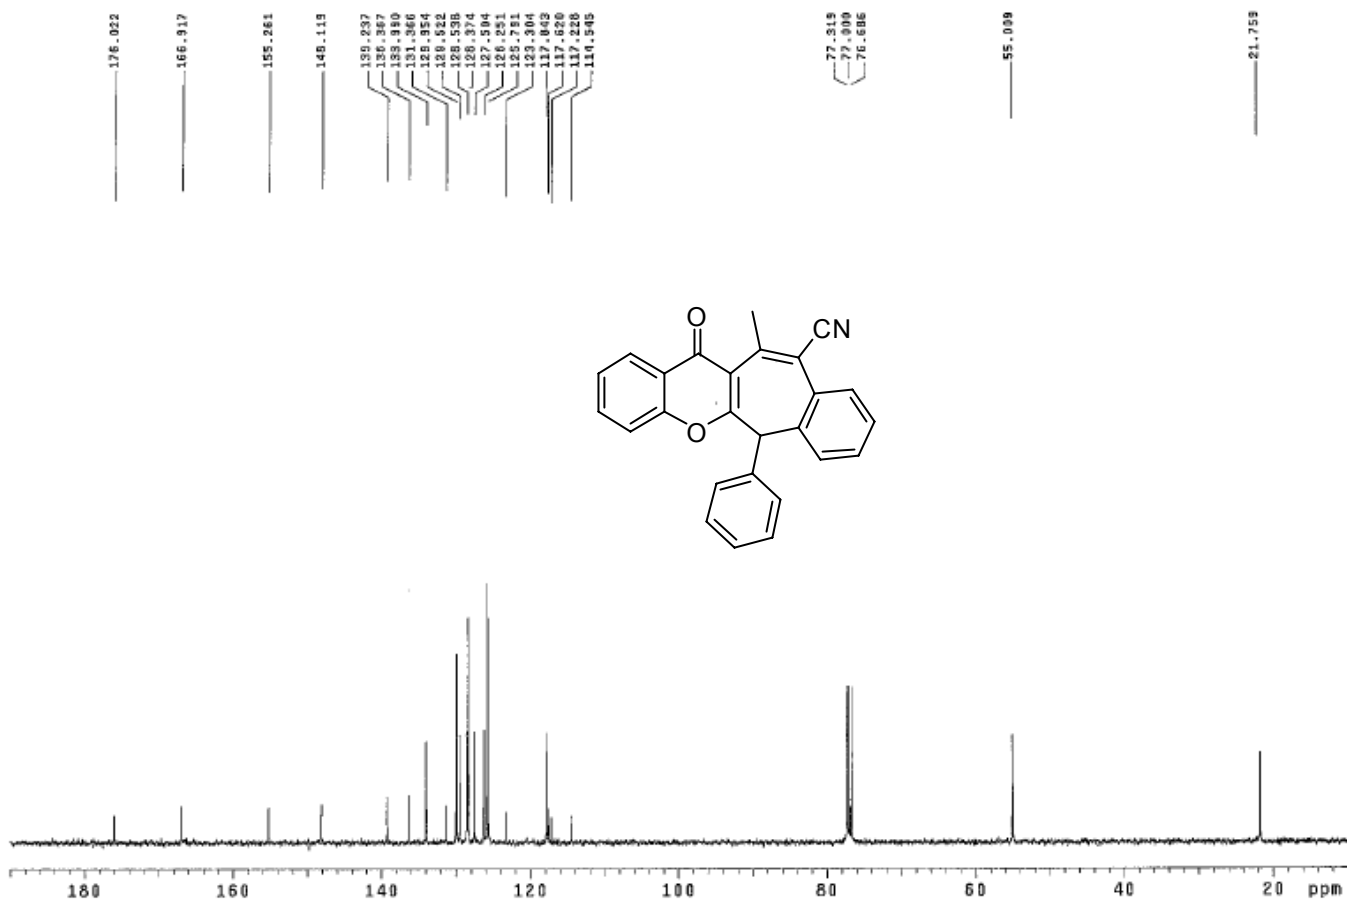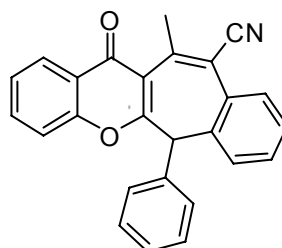

3ja

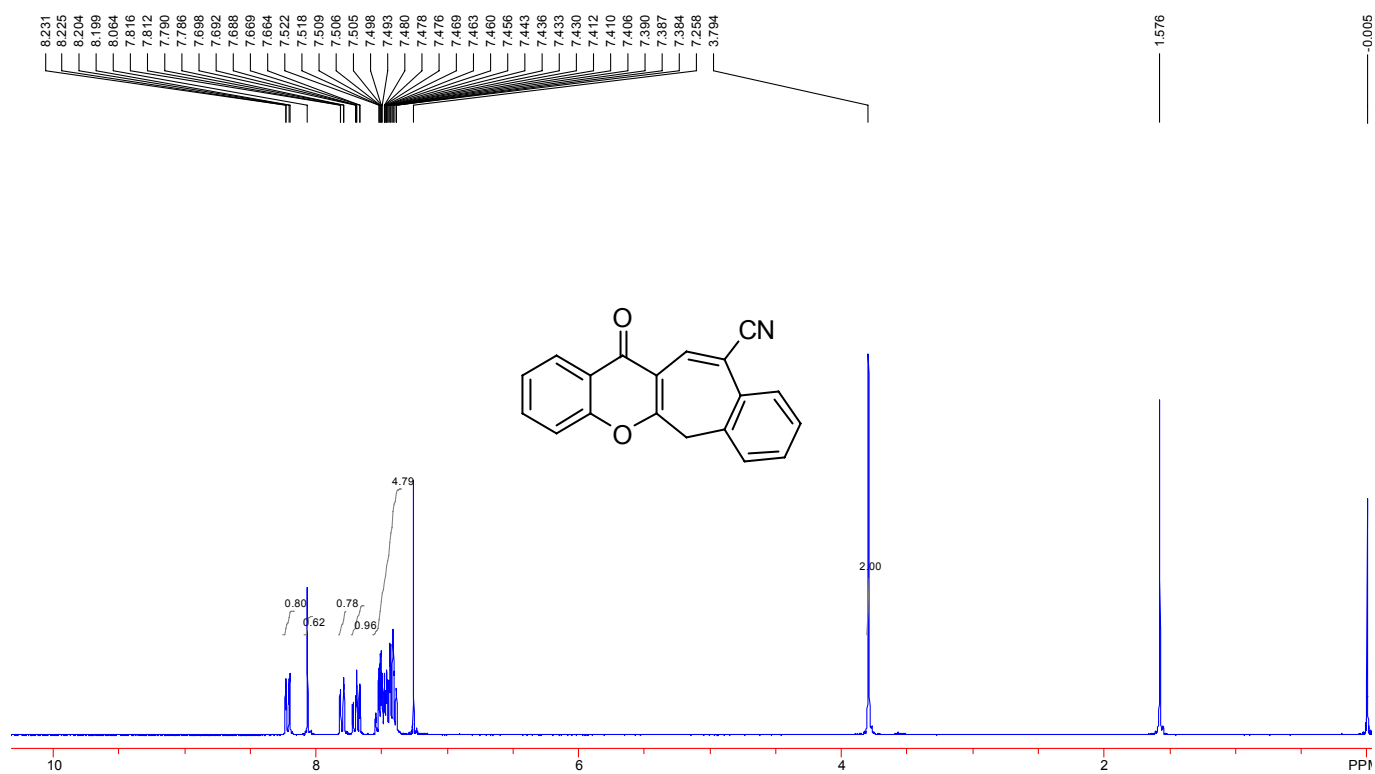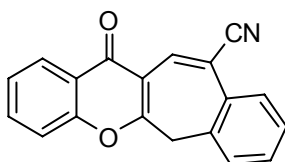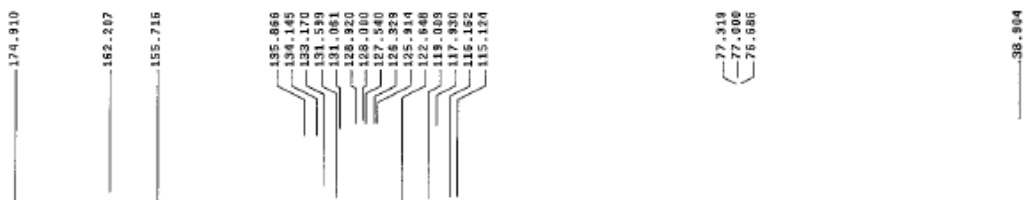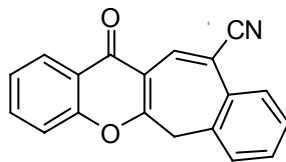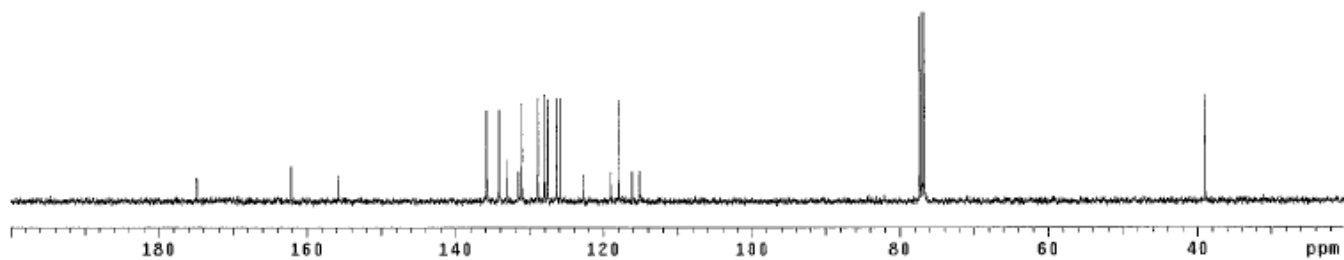

### 3ka

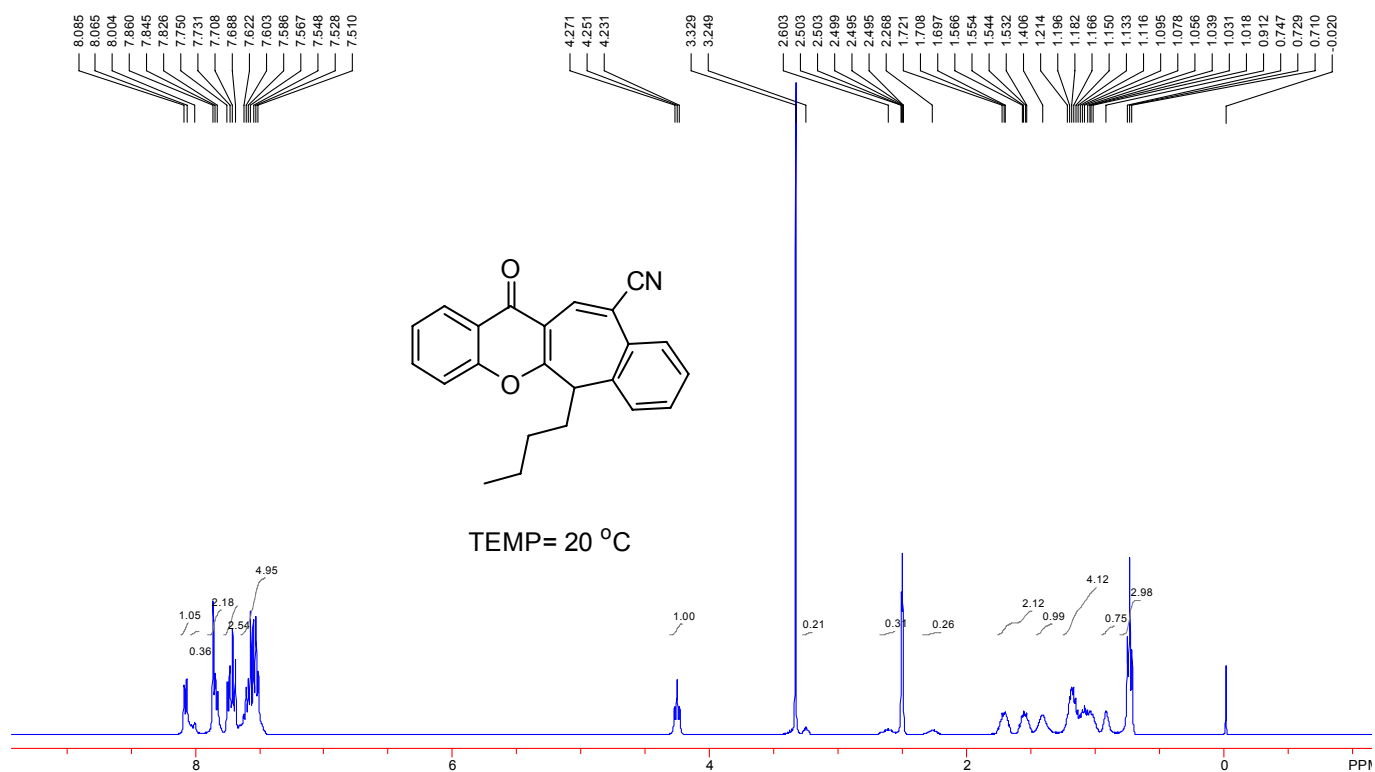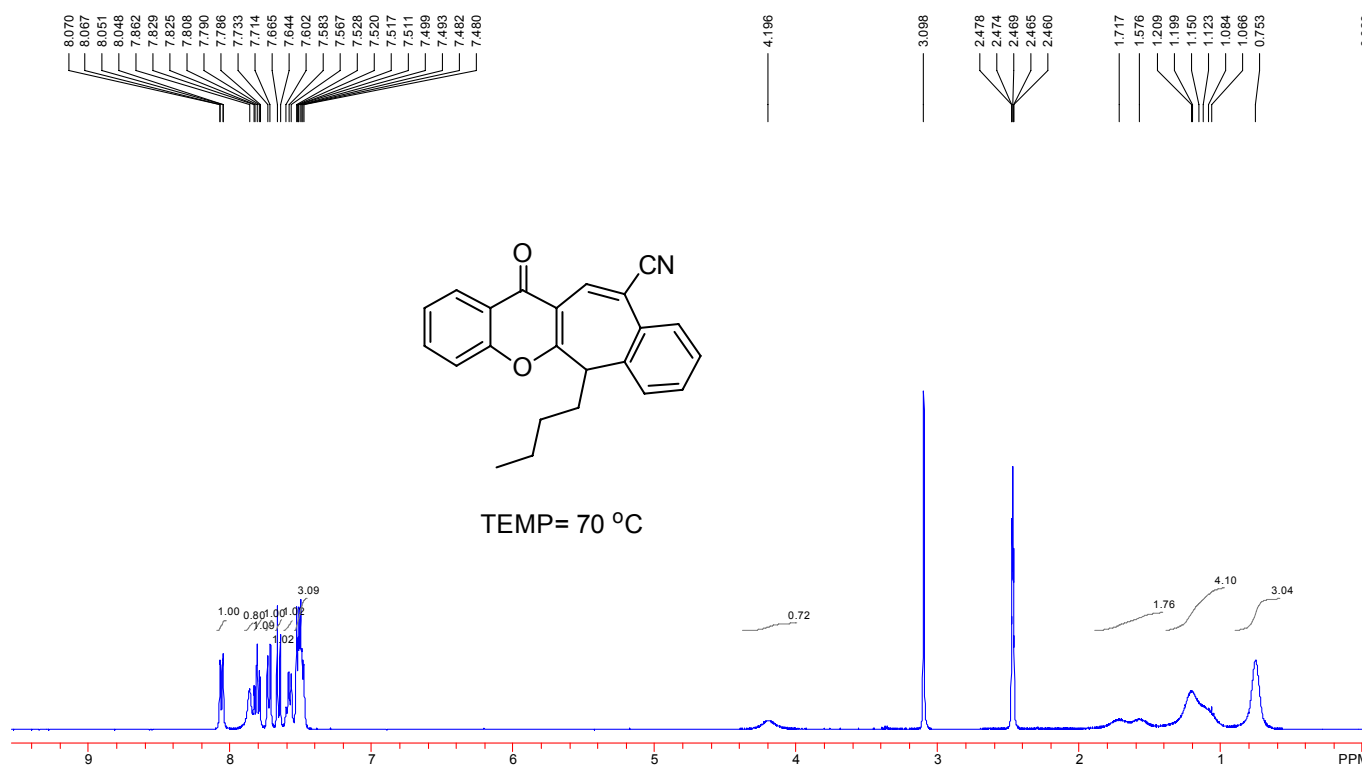

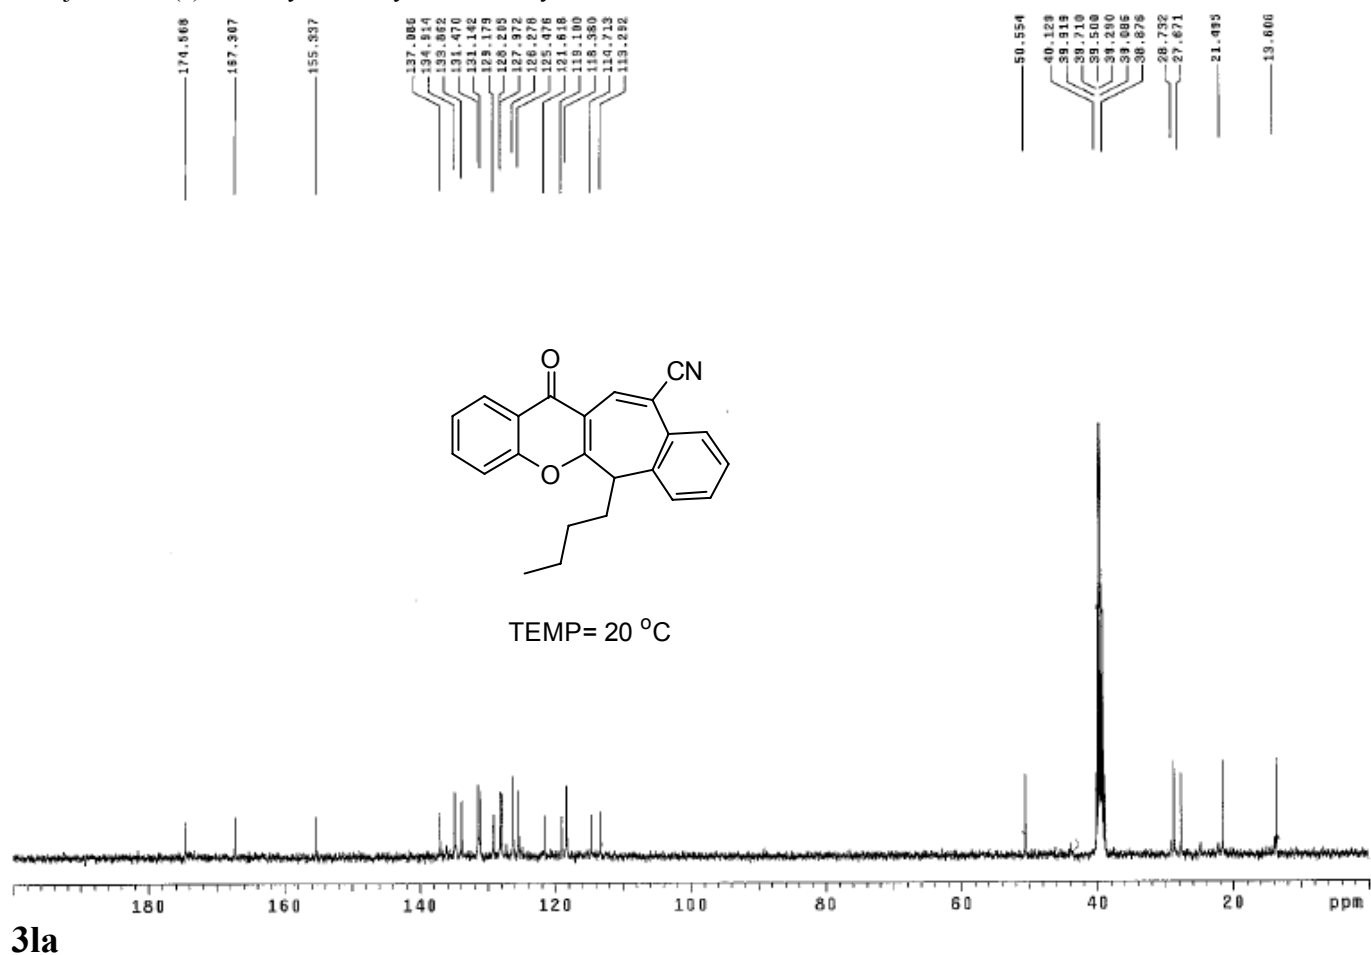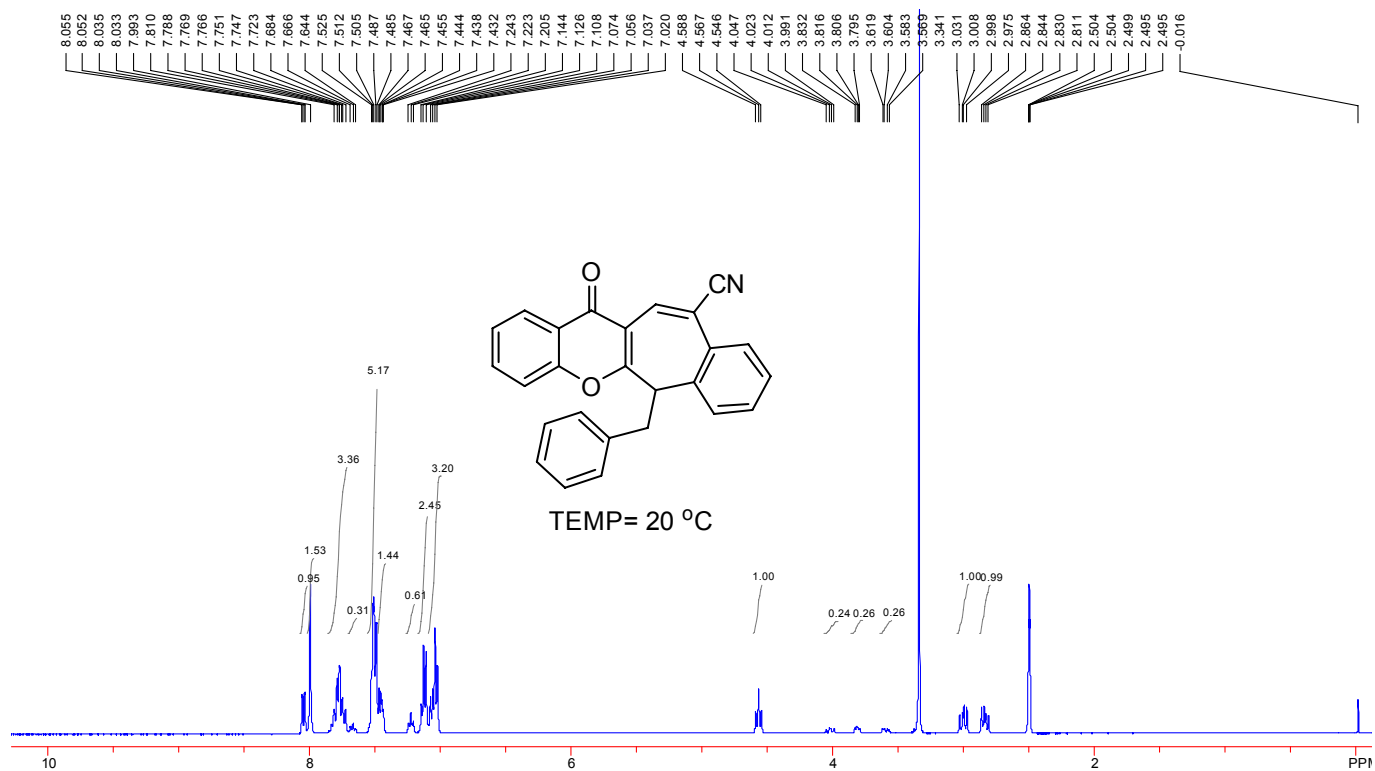

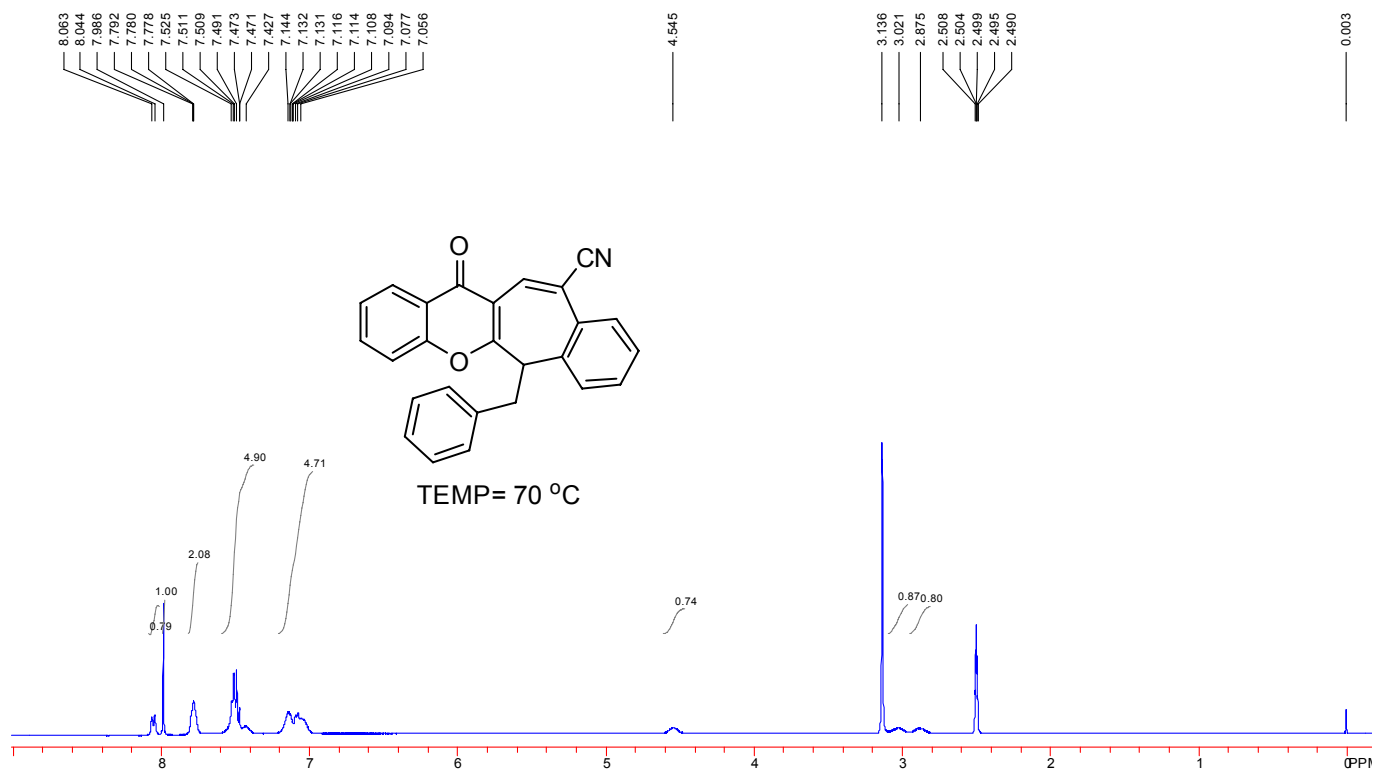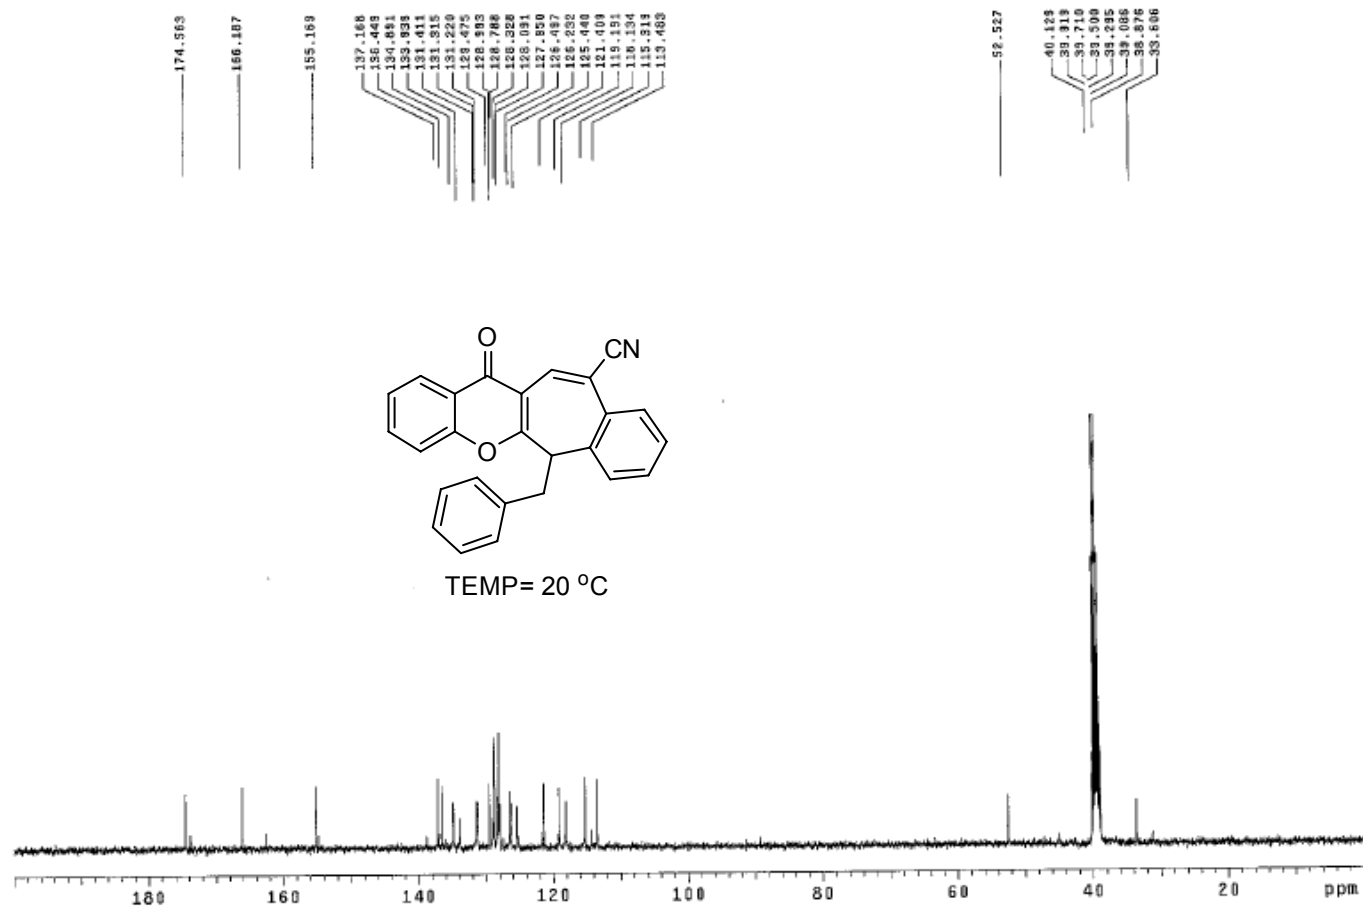

### 3ma

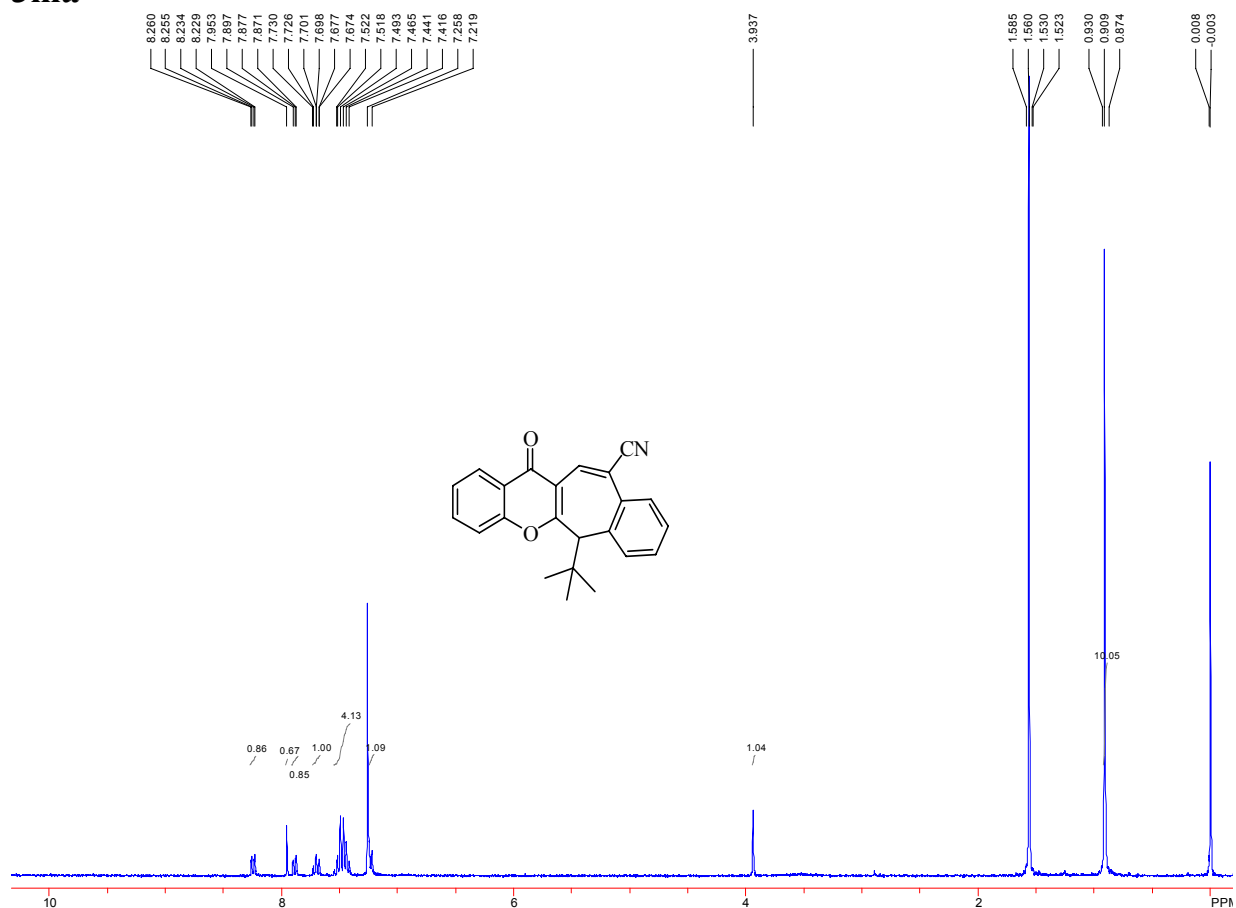

LY5-143 CDCl3 13C BB

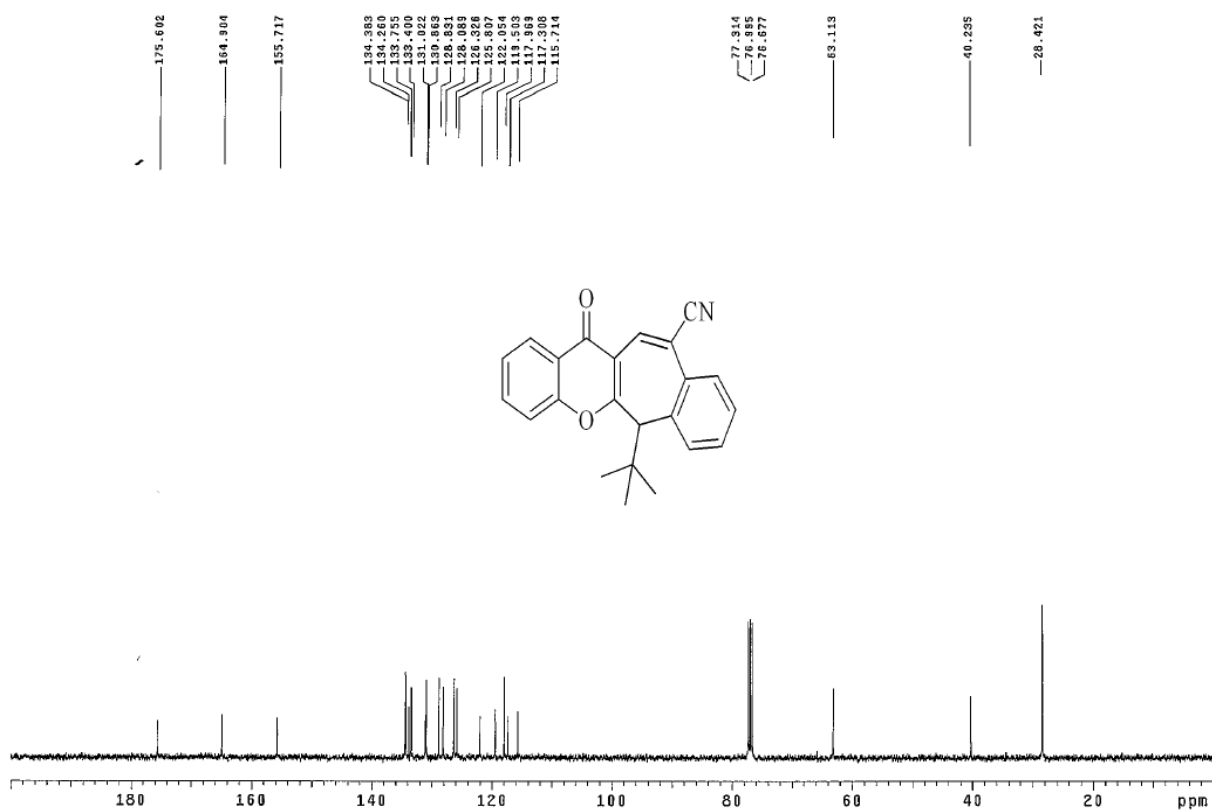

### 3ab

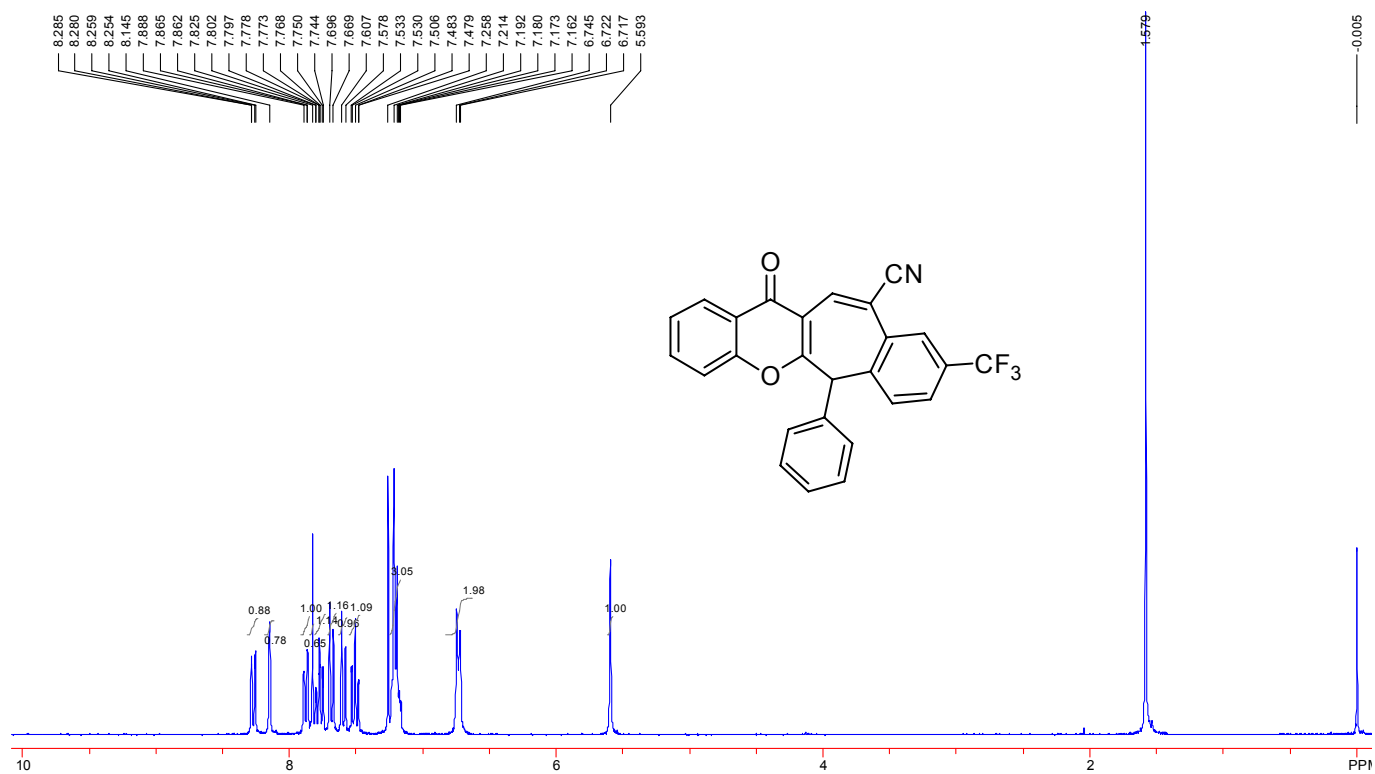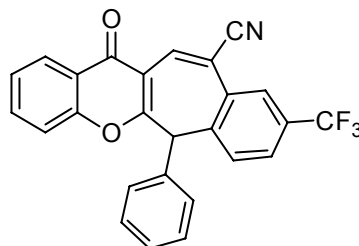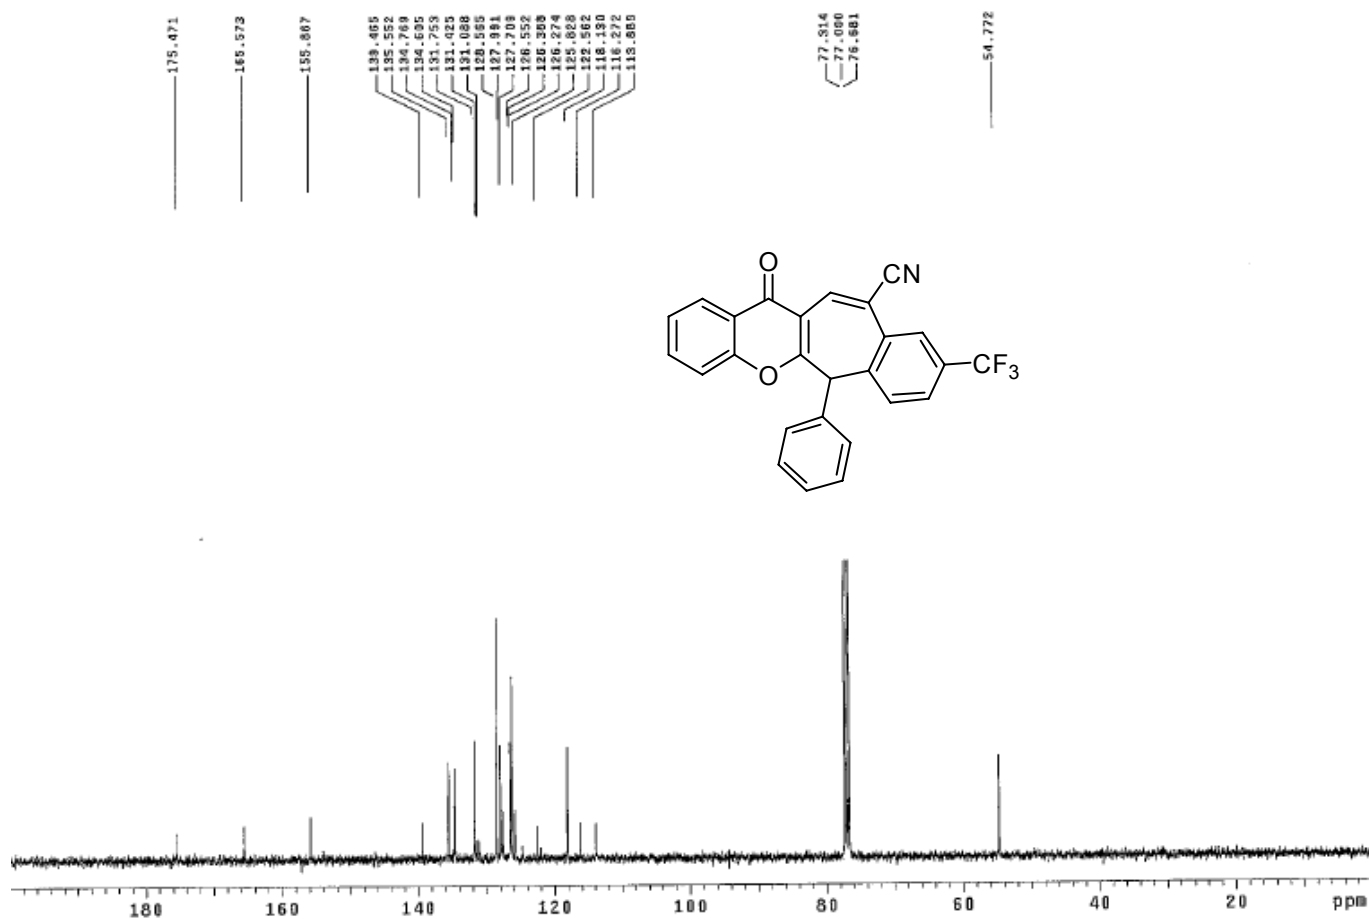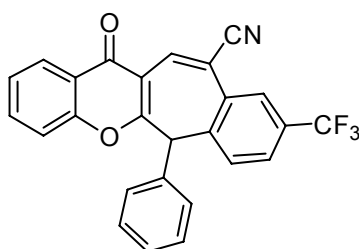



**3ac**

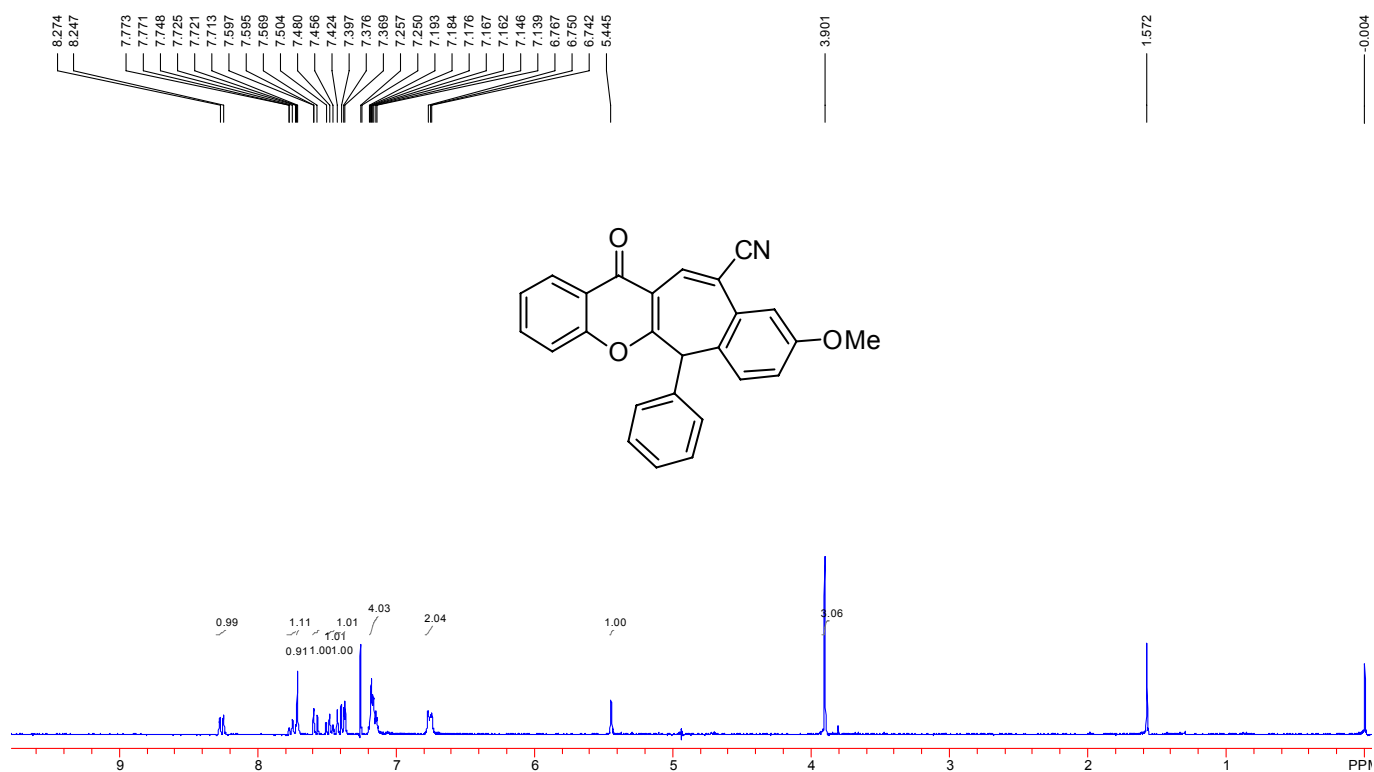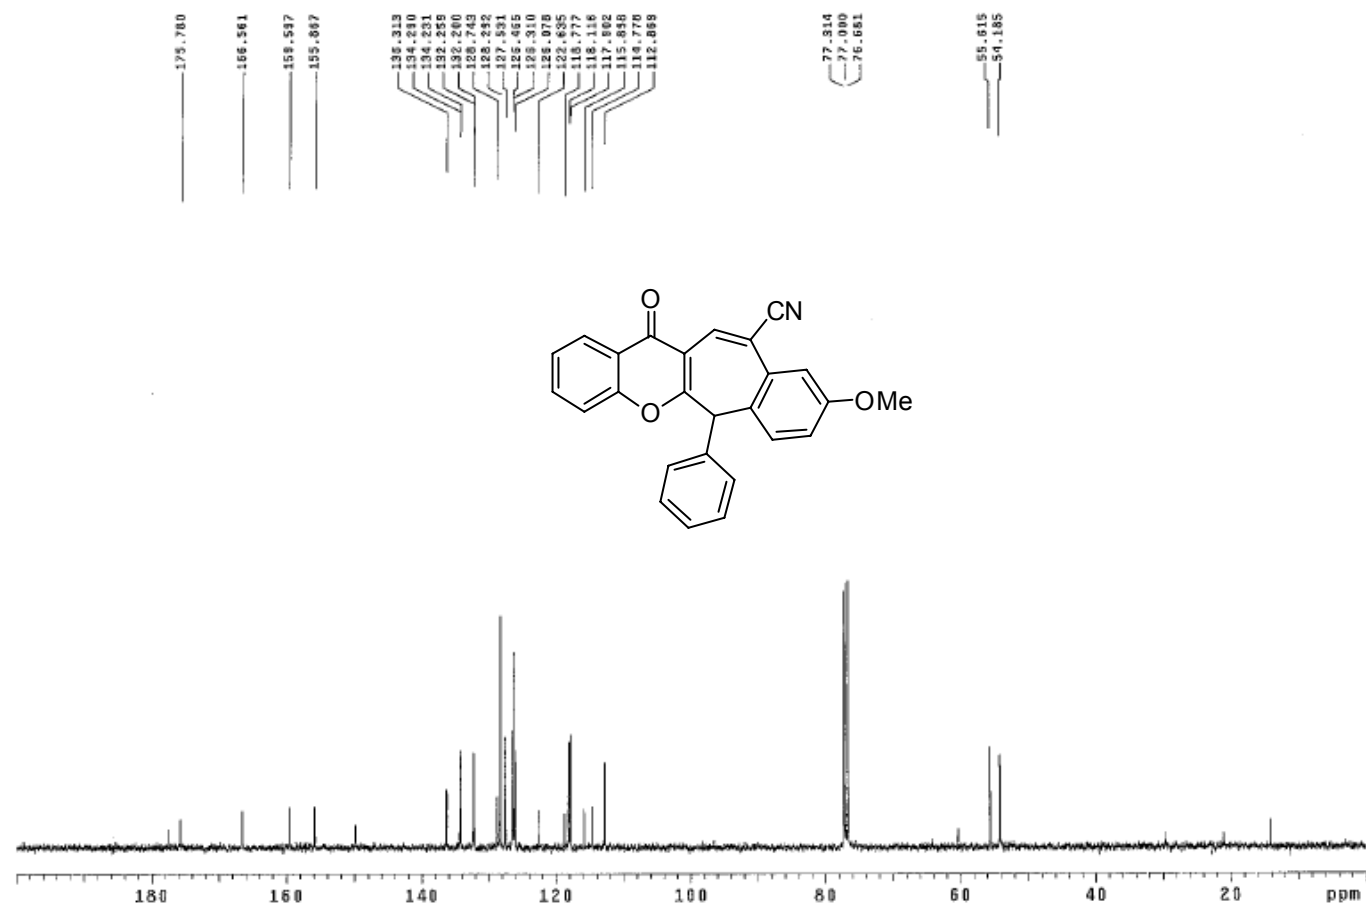

### 3ad

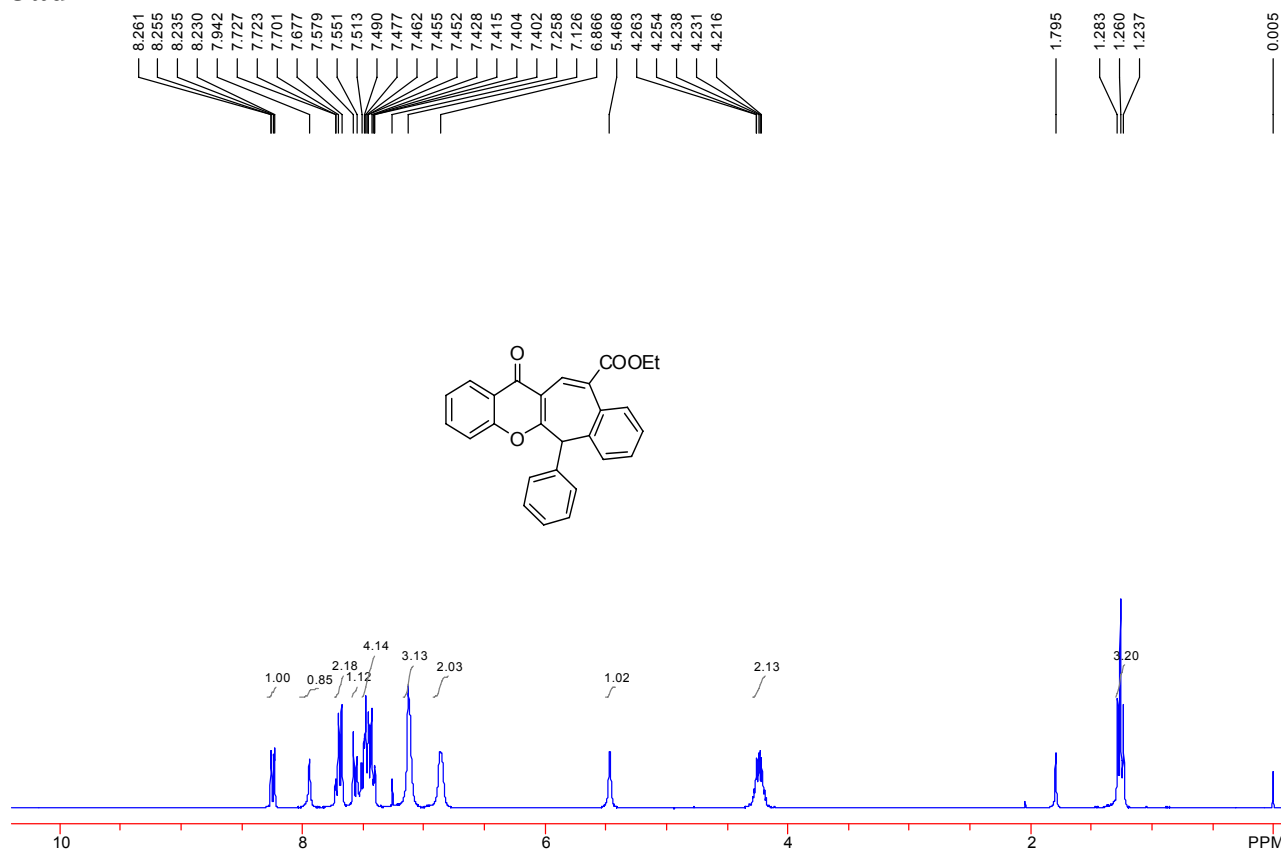

LY6-056-1 CDCl<sub>3</sub> 13C-5B

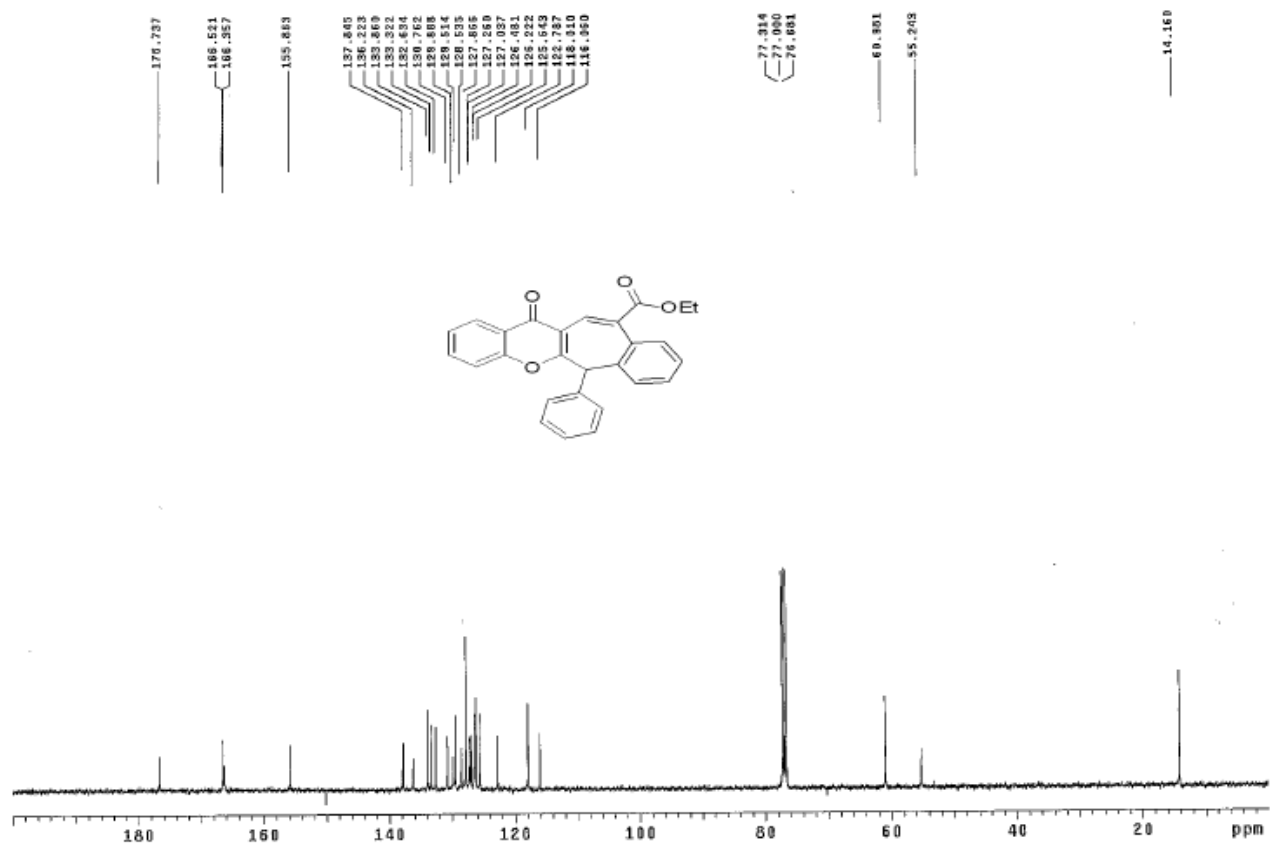

**3ae**

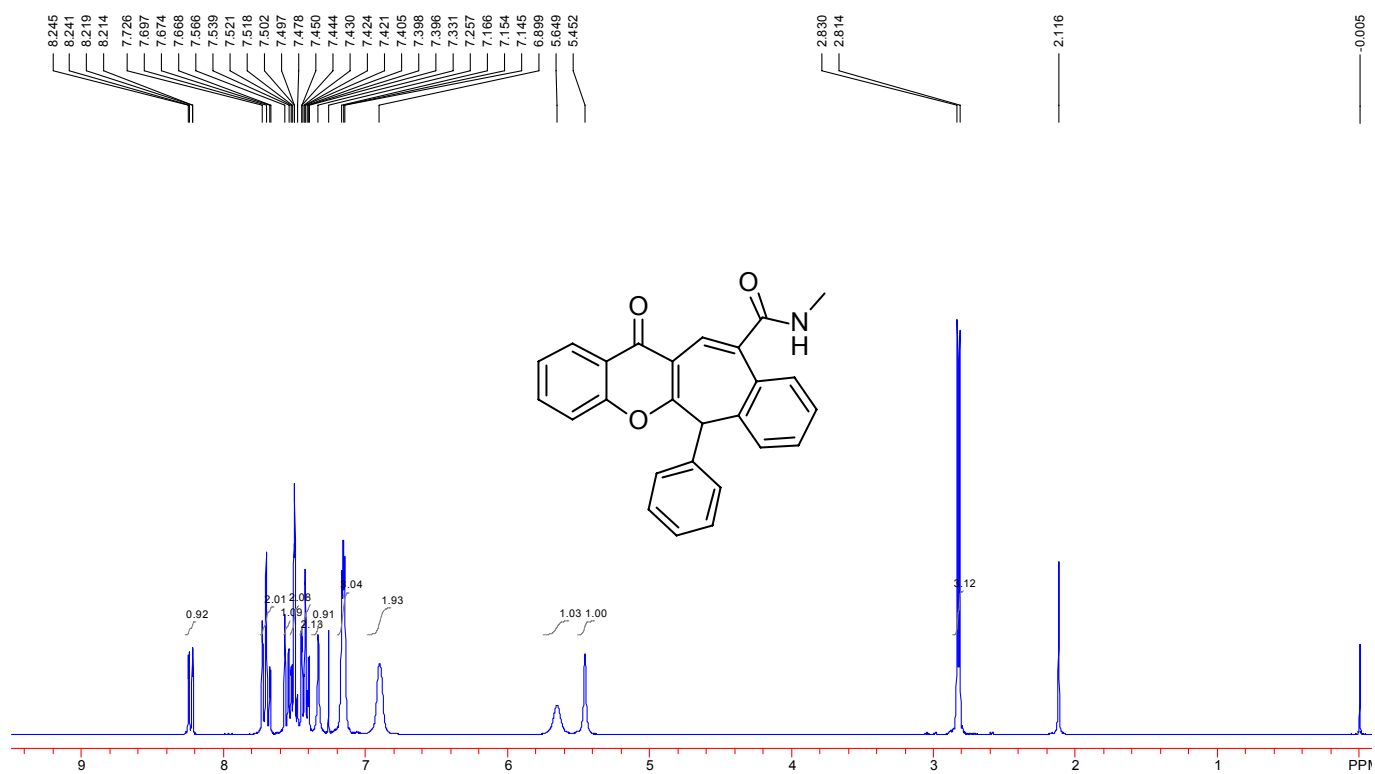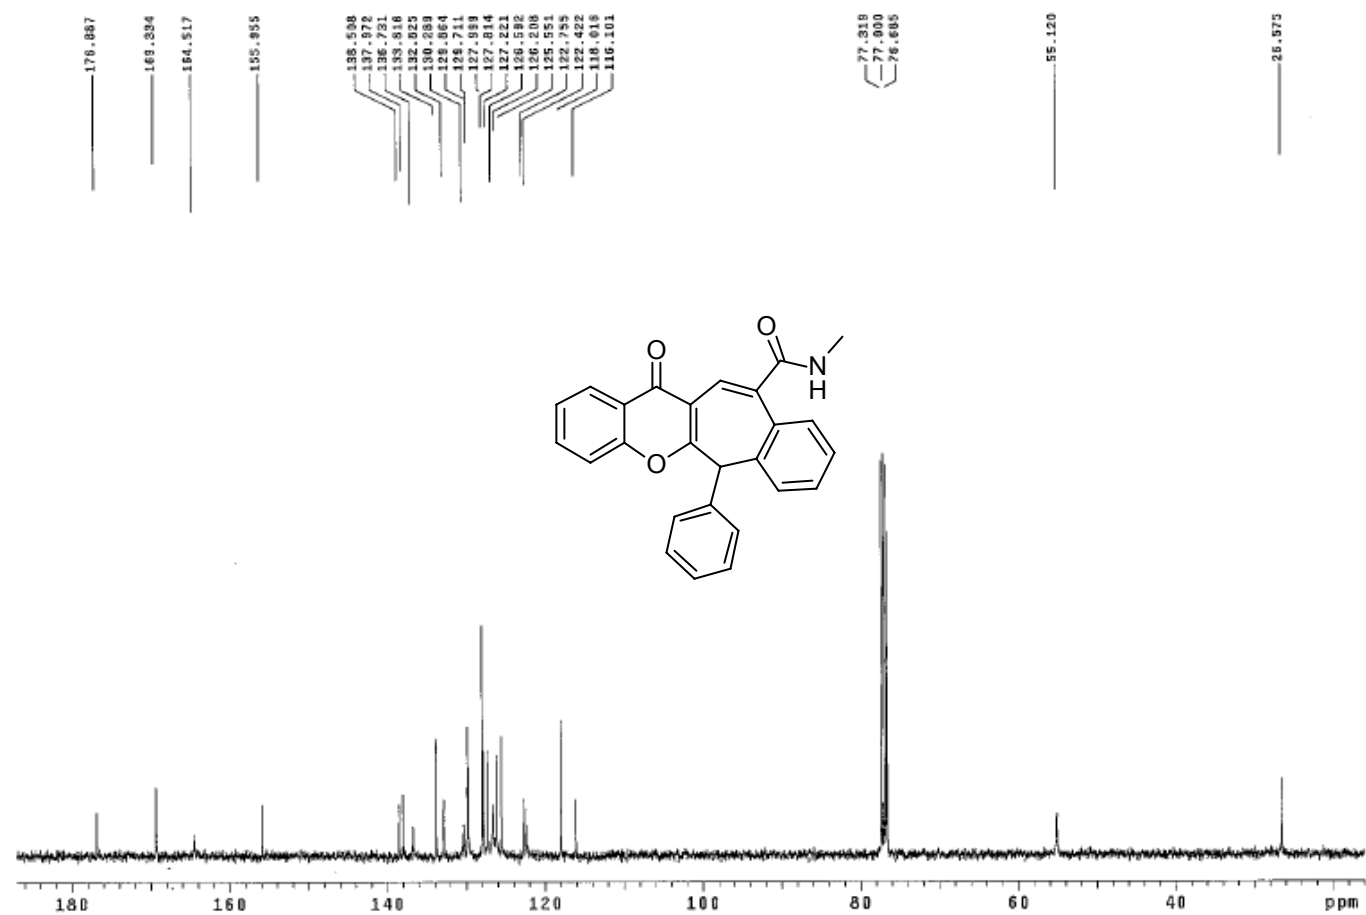

**3af**

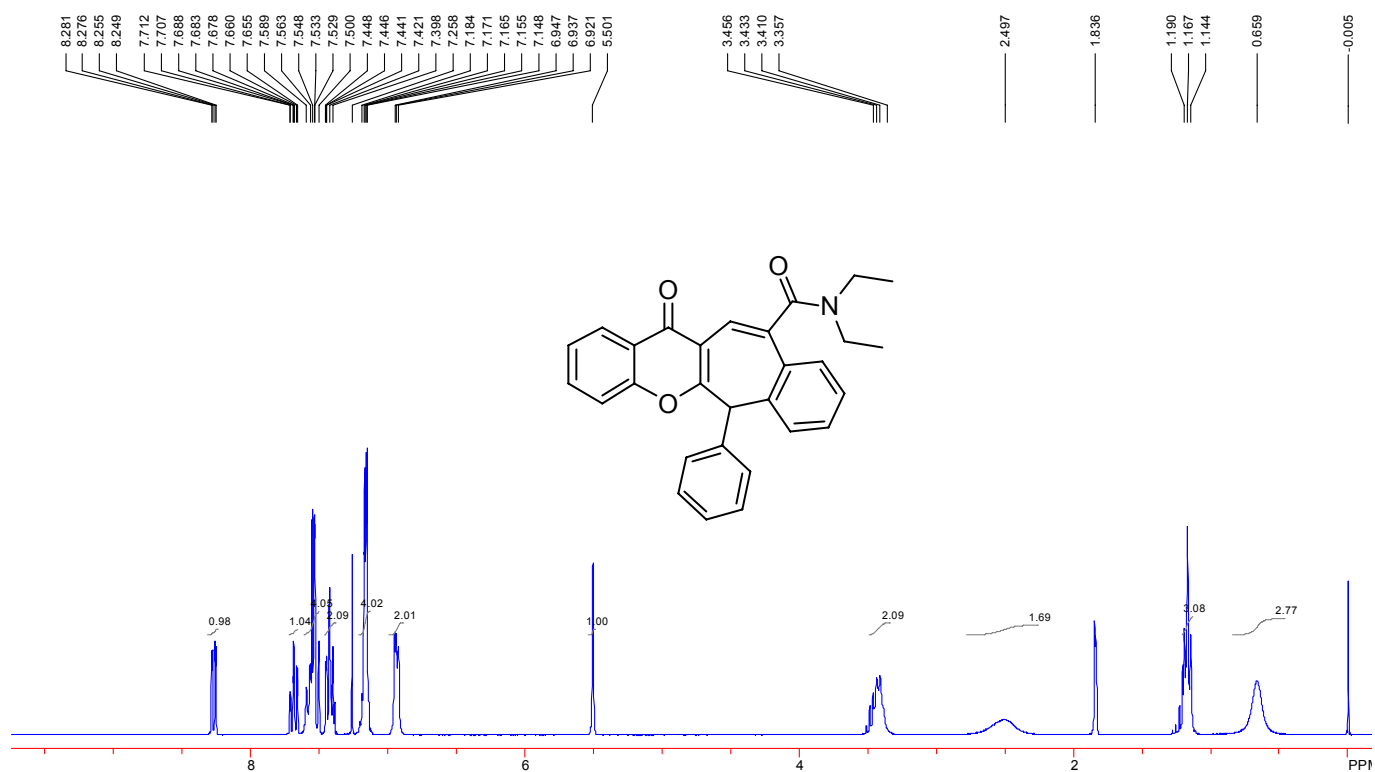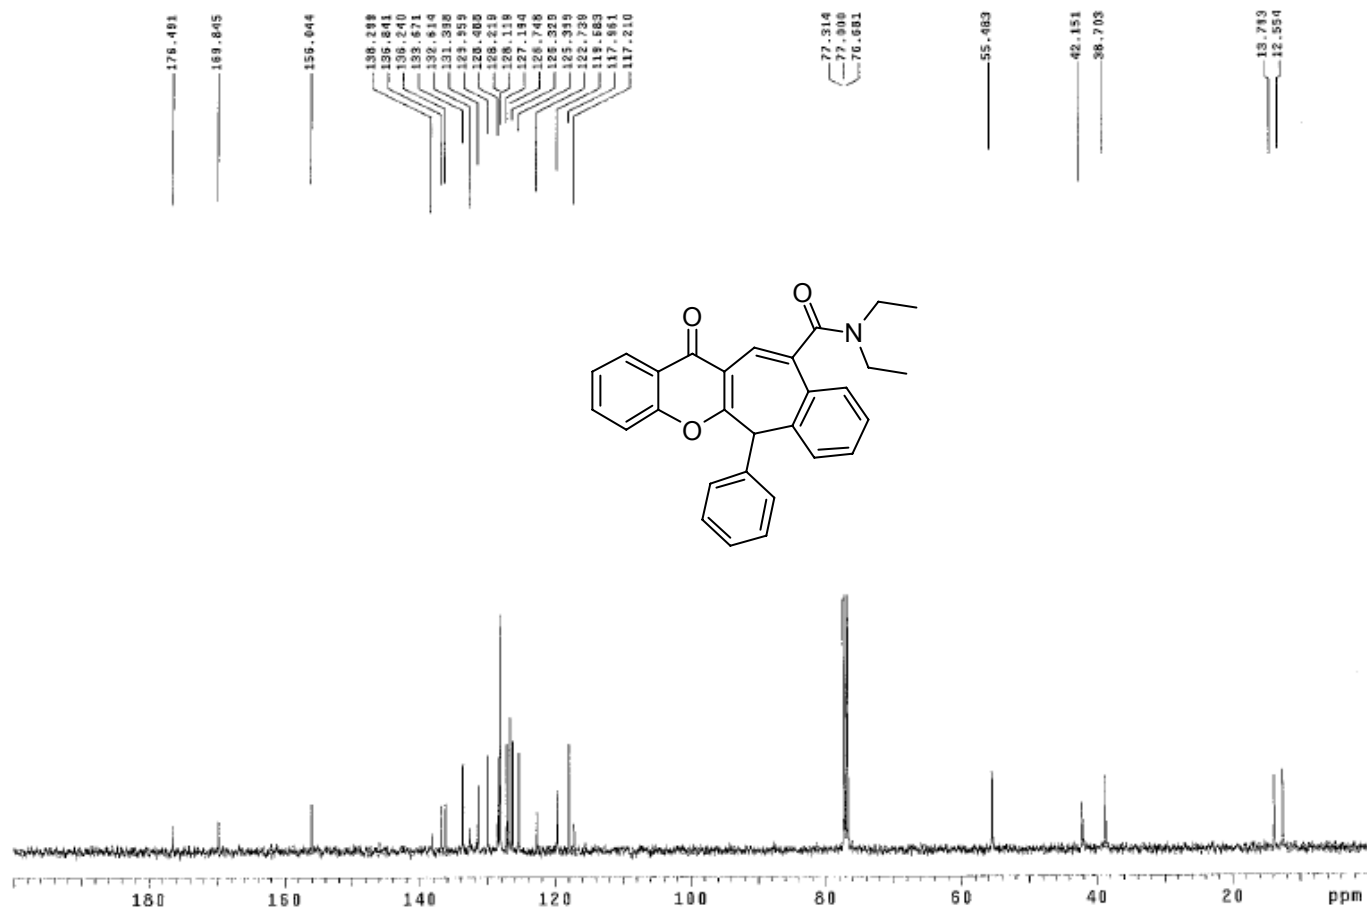

4b

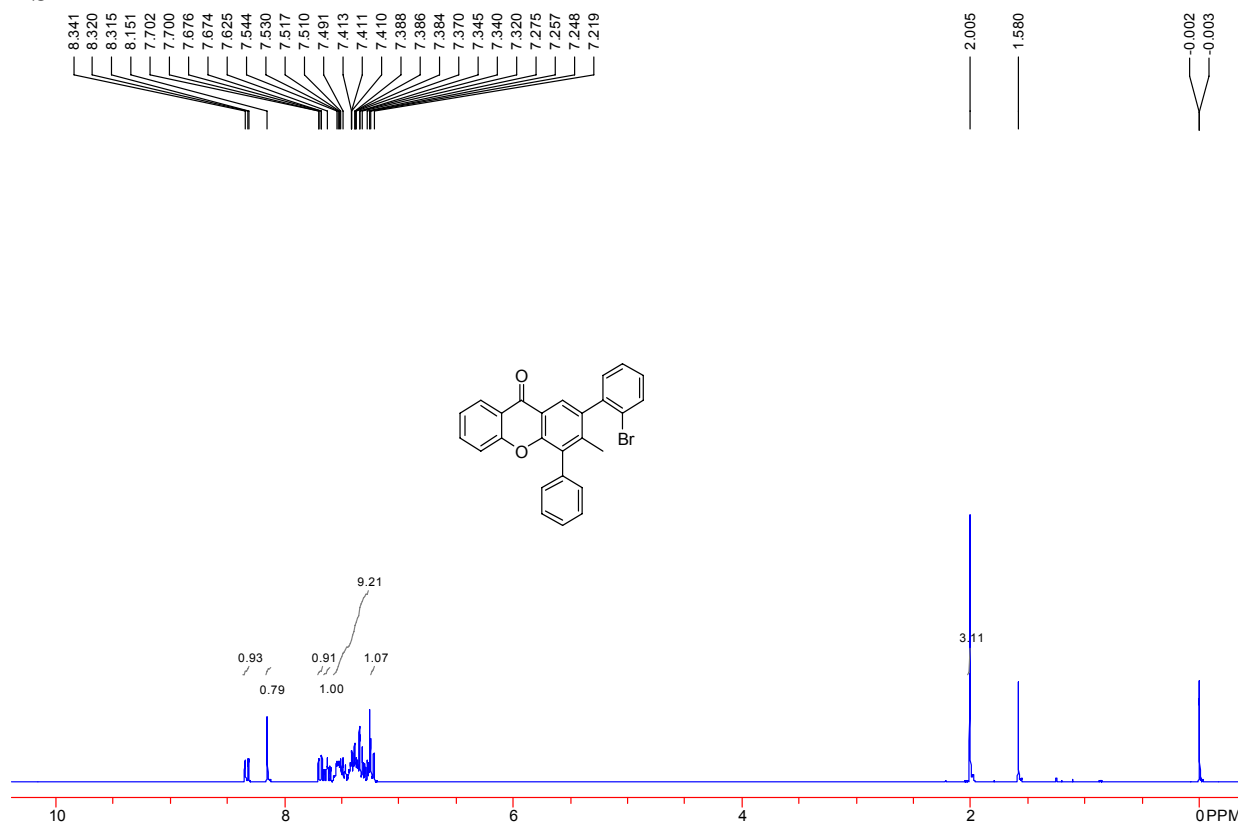

LY6-971 CDCL3 13C-88 Dec 5 2009

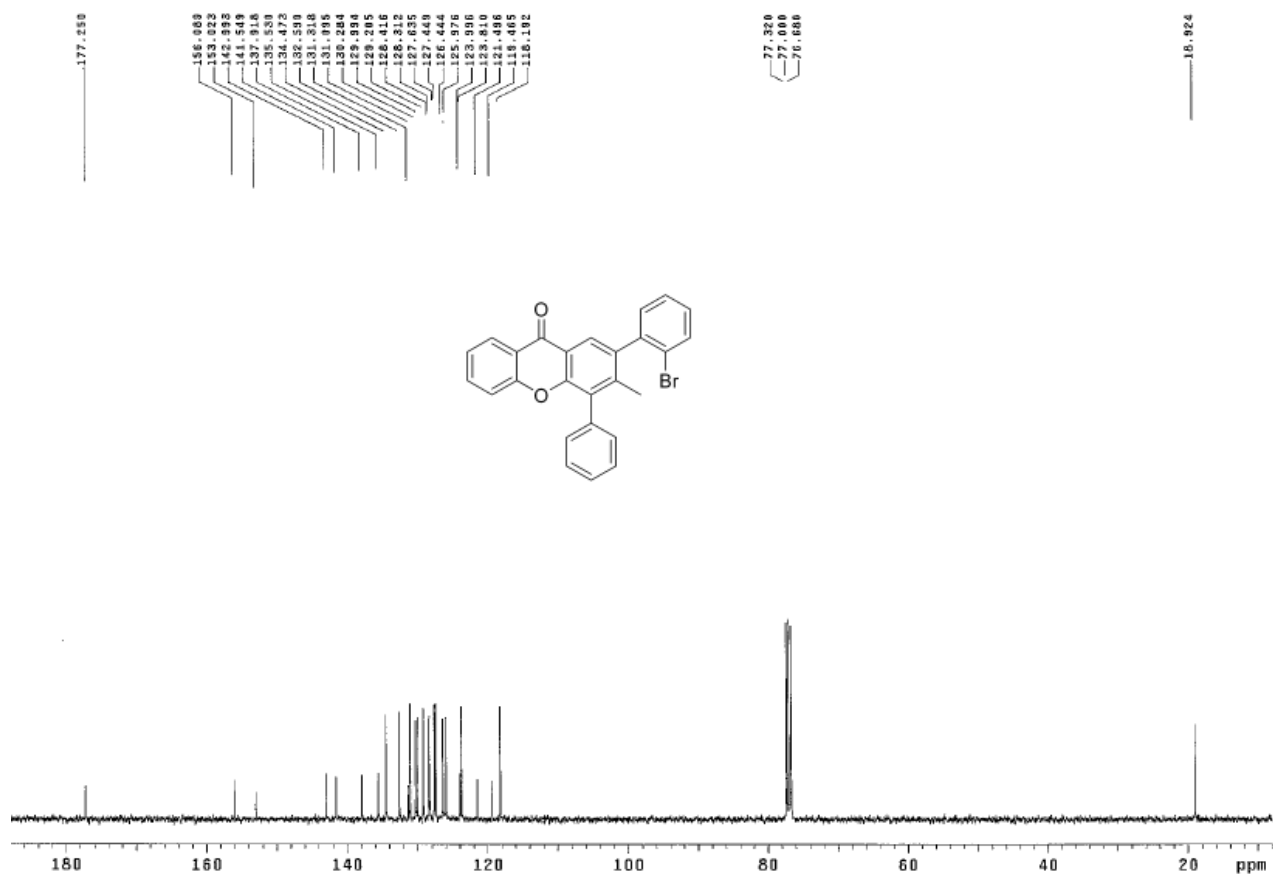

#### 4. X-ray crystal structure of **3aa** and **3ka**

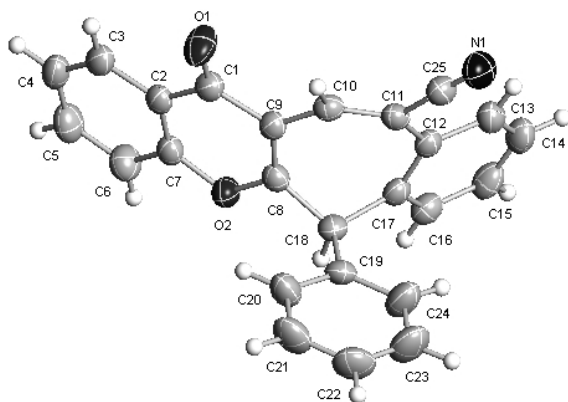

ORTEP plot of **3aa** shown with ellipsoids at the 50%

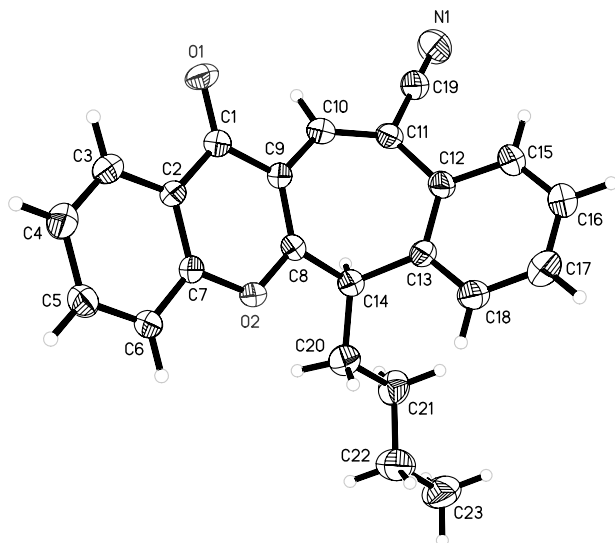

ORTEP plot of **3ka** shown with ellipsoids at the 50%
